1 **Full title:** Aberrant stromal tissue factor and mycolactone-driven vascular permeability,  
2 exacerbated by IL-1 $\beta$ , orchestrate pathogenic fibrin formation in Buruli ulcer lesions

3

4 **Short title:** Endothelial dysfunction in Buruli ulcer skin lesions

5

6 Louise Tzung-Harn Hsieh<sup>1</sup>, Scott J Dos Santos<sup>1,#a</sup>, Joy Ogbechi<sup>1,#b</sup>, Aloysius D. Loglo<sup>1,#c</sup>,  
7 Francisco J. Salguero<sup>2</sup>, Marie-Thérèse Ruf<sup>3,4</sup>, Gerd Pluschke<sup>3,4</sup>, and Rachel E. Simmonds<sup>1,\*</sup>

8

9 <sup>1</sup>Department of Microbial Sciences, School of Bioscience and Medicine, University of Surrey,  
10 Guildford, United Kingdom

11

12 <sup>2</sup>Public Health England, Manor Farm Road, Porton Down, Salisbury, United Kingdom

13

14 <sup>3</sup>Swiss Tropical and Public Health Institute, Basel, Switzerland

15

16 <sup>4</sup>University of Basel, Basel, Switzerland

17

18 <sup>#a</sup> Current address: Western College of Veterinary Medicine, University of Saskatchewan,  
19 Saskatoon, Canada

20

21 <sup>#b</sup> Current address: Kennedy Institute of Rheumatology, University of Oxford, Roosevelt Drive,  
22 Headington, Oxford, United Kingdom

23

24 <sup>#c</sup> Current address: Kumasi Centre for Collaborative Research in Tropical Medicine, Kwame  
25 Nkrumah University of Science and Technology, Kumasi, Ghana

26

27 \* Corresponding author, email: [rachel.simmonds@surrey.ac.uk](mailto:rachel.simmonds@surrey.ac.uk)

28

**NOTE:** This preprint reports new research that has not been certified by peer review and should not be used to guide clinical practice.

29 **Author contributions**

30 Conceptualization: LTHH FJS RES. Performed the experiments: LTHH JO ADL MTR.  
31 Analysed the data: LTHH SJDS JO FJS MTR RES. Contributed materials: MTR GP. Wrote  
32 the manuscript: LTHH SJDS FJS MTR RES. Funding acquisition: GP RES.

33

## 34 **Abstract**

35 The neglected tropical disease Buruli ulcer, caused by *Mycobacterium ulcerans* infection,  
36 displays coagulative necrosis in affected skin tissues. We previously demonstrated that  
37 exposure to the *M. ulcerans* exotoxin mycolactone depletes the expression of thrombomodulin  
38 and impacts anticoagulation at the endothelial cell surface. Moreover, while widespread fibrin  
39 deposition is a common feature of BU lesions, the cause of this phenotype is not clear. Here,  
40 we performed sequential staining of serial tissue sections of BU patient biopsies and unbiased  
41 analysis of up to 908 individual non-necrotic vessels of eight BU lesions to investigate its  
42 origins. Most vessels showed evidence of endothelial dysfunction being thrombomodulin-  
43 negative, von Willebrand factor-negative and/or had endothelium that stained positively for  
44 tissue factor (TF). Primary haemostasis was rarely evident by platelet glycoprotein CD61  
45 staining. Localisation of TF in these lesions was complex and aberrant, including diffuse  
46 staining of the stroma some distance from the basement membrane and TF-positive infiltrating  
47 cells (likely eosinophils). This pattern of abnormal TF staining was the only phenotype that  
48 was significantly associated with fibrin deposition, and its extent correlated significantly with  
49 the distance that fibrin deposition extended into the tissue. Hence, fibrin deposition in Buruli  
50 ulcer lesions is likely driven by the extrinsic pathway of coagulation. To understand how this  
51 could occur, we investigated whether clotting factors necessary for fibrin formation might gain  
52 access to the extravascular compartment due to loss of the vascular barrier. *In vitro* assays  
53 using primary vascular and lymphatic endothelial cells showed that mycolactone increased  
54 the permeability of monolayers to dextran within 24 hours. Moreover, co-incubation of cells  
55 with interleukin-1 $\beta$  exacerbated mycolactone's effects, nearly doubling the permeability of the  
56 monolayer compared to each challenge alone. We propose that leaky vascular and lymphatic  
57 systems are important drivers of extravascular fibrin deposition, necrosis and oedema  
58 frequently seen in Buruli ulcer patients.

59

## 60 **Author Summary**

61 To date, the debilitating skin disease Buruli ulcer remains a public health concern and financial  
62 burden in low or middle-income countries, especially in tropical regions. Late diagnosis is  
63 frequent in remote areas, perhaps due to the painlessness of the disease. Hence patients  
64 often present with large, destructive opened ulcers leading to delayed wound closure or even  
65 lifelong disability. The infectious agent produces a toxin called mycolactone that drives the  
66 disease. We previously found evidence that the blood clotting system is disrupted by  
67 mycolactone in these lesions, and now we have further explored potential explanations for  
68 these findings by looking at the expression of coagulation regulators in BU. In detailed analysis  
69 of patient skin punch biopsies, we identified distinct expression patterns of certain proteins  
70 and found that tissue factor, which initiates the so-called extrinsic pathway of blood clotting, is  
71 particularly important. Mycolactone is able to disrupt the barrier function of the endothelium,  
72 further aggravating the diseased phenotype, which explains how clotting factors access the  
73 tissue. Altogether, such localised hypercoagulation in Buruli ulcer skin lesions may contribute  
74 to the development of the lesion.

## 75 Introduction

76 Buruli ulcer (BU) is a neglected tropical disease, resulting from a subcutaneous infection with  
77 *Mycobacterium ulcerans*, with approximately 2700 new cases reported globally in 2018  
78 according to the latest update from World Health Organization (WHO) [1]. BU endemic areas  
79 include West and Central African countries as well as Australia; globally over 30 countries  
80 have reported cases with estimated prevalence ranging from 3.2-26.7 BU cases per 10,000  
81 population [2, 3]. BU presents in various forms such as nodules, plaques, ulcers and oedema  
82 [2]. In late diagnosed cases, necrotic skin lesions and soft tissue destruction can extend to  
83 15% of body surface area, which may cause lifelong disability [4]. This debilitating skin  
84 condition can be treated with dual anti-mycobacterial antibiotics, sometimes alongside surgical  
85 removal of infected skin tissues [5]. Yet delayed wound healing rate remains a critical issue,  
86 especially in patients bearing large, open lesions [6].

87  
88 Histopathological analyses of BU patient biopsies reveal unique features of *M. ulcerans*  
89 infections [7]. For instance, the coagulative necrosis seen in BU lesions displays a relative  
90 paucity of leukocytic infiltration close to the bacilli themselves [7, 8]. Instead, neutrophils are  
91 seen in the peripheral areas [9] and necrotic tissues often extend some distance from the site  
92 of mycobacterial colonisation [7, 10]. Both characteristics are caused by the lipid-like exotoxin  
93 produced by *M. ulcerans*, mycolactone [10, 11], which is synthesised by polyketide synthases  
94 encoded on a megaplasmid, pMUM001 [12].

95  
96 Mechanistically, mycolactone causes cell cycle arrest in G<sub>0</sub>/G<sub>1</sub> and subsequent progression  
97 to apoptosis after 48-72 hours, depending on cell type [10, 13]. Mycolactone can potentiate  
98 an integrated stress response via eIF2 $\alpha$  phosphorylation and ATF4 activation [14, 15]. In  
99 addition, mycolactone has immunosuppressive effects on the maturation or functions of  
100 macrophages, dendritic cells and T cells [16-20]. All these activities can now be attributed to

101 mycolactone's inhibitory effect on Sec61 translocon [21, 22], which affects co-translational  
102 translocation of proteins into the endoplasmic reticulum (ER) [21, 23-26]. This blockade leads  
103 to protein translation in the wrong cellular compartment followed by their proteasomal  
104 degradation [21] and activation of autophagy pathways [14, 27]. Cells carrying mutations in  
105 the gene encoding Sec61 $\alpha$  are resistant to mycolactone-driven cytotoxicity, supporting this as  
106 the primary target of mycolactone, at least at lower doses [14, 22, 23].

107

108 Mycolactone targeting of the Sec61 translocon is seen in various cell types, including  
109 endothelial cells, which regulate many physiological functions related to blood vessel  
110 homeostasis [21, 28]. Normally, endothelial cells form a monolayer that lines the lumen of  
111 blood vessels or form the capillaries. This semi-selective barrier controls the passage of small  
112 molecules and white blood cells into and out of the bloodstream [29, 30]. When blood vessels  
113 are injured, platelets rapidly attach to the damaged sites on the endothelium via its binding  
114 partner von Willebrand factor (vWF) [29, 31]. Secondly to platelet plug formation,  
115 coagulation reinforces the plug by producing a fibrin mesh to hold it in place [29]. Fibrin clot  
116 formation can be triggered by both contact activation on a negative-charged, damaged surface  
117 or via the tissue factor (TF)-initiated extrinsic coagulation pathway. TF exposed from the sub-  
118 endothelium binds to blood-borne factor VIIa and other clotting factors, leading to thrombin  
119 activation and consequent processing of fibrinogen to fibrin [31]. These haemostatic pathways  
120 are regulated by the endothelium through its expression of specific molecules that function in  
121 anticoagulant pathways [30]. These include thrombomodulin (TM) and the endothelial cell  
122 protein C receptor (EPCR) that activate the protein C anticoagulant pathway [30, 32], tissue  
123 factor pathway inhibitor (TFPI) that suppresses the factor VIIa-TF complex and free factor Xa  
124 activity [33], and heparan sulphate proteoglycans within the glycocalyx that bind antithrombin  
125 to directly inhibit thrombin [34].

126

127 We previously showed that mycolactone depletes thrombomodulin and the EPCR from  
128 primary human dermal microvascular endothelial cells (HDMECs) [28]. Reduced  
129 thrombomodulin staining was also seen in clinical specimens of BU where it was associated  
130 with fibrin deposition, itself strongly correlated with tissue necrosis [28]. While we did consider  
131 the dermis and subcutis separately, we acknowledged challenges in the analysis due to tissue  
132 heterogeneity. In order to overcome these challenges and to better understand the role and  
133 origin of fibrin deposition in BU lesions, originally reported in the mid-20<sup>th</sup> Century, we  
134 performed immunohistochemical staining of serial tissue sections of BU patient skin biopsies  
135 for vascular and coagulation biomarkers. This more comprehensive analysis now shows an  
136 unexpected paucity of platelets, even in areas with extensive fibrin deposition, and widespread  
137 endothelial dysfunction. Fibrin deposition is explained by abnormal expression patterns of TF,  
138 implicating the involvement of extrinsic clotting pathway. The largest effect was driven by  
139 vessels that displayed TF staining at significant distance away from the basement membrane.  
140 In parallel experiments, our *in vitro* data showed that mycolactone increased the permeability  
141 of endothelial monolayers. Taken together our findings suggest that the vessels in BU lesions  
142 may become “leaky” during infection due to loss of the endothelial barrier integrity, and that  
143 this drives fibrin formation.

## 144 **Results**

145 Immunostaining was performed on serial skin biopsy tissue sections from 8 untreated,  
146 laboratory confirmed BU patients (6 with ulcerative lesions and 2 with plaque, covering 3 WHO  
147 categories; Table 1 and S1 Fig). Repeat staining for several markers on different sections of  
148 the same punch biopsies in Ogbechi et al., 2015 [28] revealed that the pathology of Buruli  
149 ulcer is highly focal, even within these small 4mm samples of infected skin (S2A Fig). Hence,  
150 serial sections minimise drift throughout the biopsy sample and allow the tracking of individual  
151 vessels within the skin (S2B Fig) between the sections. The sections were stained in the  
152 following order: haematoxylin-eosin, fibrin, thrombomodulin (CD141), CD61, CD31 (Platelet  
153 endothelial cell adhesion molecule; PECAM-1), smooth muscle actin (SMA), Ziehl-Neelsen,  
154 TF and vWF. Regions of BU punch biopsy samples containing as many non-necrotic blood  
155 vessels as possible were defined by a pathologist prior to the start of analysis. This decision  
156 was made based on the number of blood vessels present that were positive for SMA or CD31  
157 and whether there was any submacroscopic appearance of coagulative necrosis present in  
158 the corresponding H&E section. These “pre-defined” regions (see methods) are outlined in red  
159 in S1 Fig; nine areas were within the dermis and one area was located in the subcutis.  
160 Quantitative analysis concerned all identifiable vessels within these regions, regardless of  
161 whether nearby tissue displayed local signs of necrosis, in order to facilitate an unbiased  
162 analysis. Qualitative comparative analysis of the novel biomarkers not yet explored in BU  
163 (CD61, vWF and TF) was also performed across the whole biopsies, including areas that were  
164 highly necrotic. Acid fast bacilli were only visible in the sections from two of the patients (S2C  
165 Fig), therefore we do not report analysis of the coincidence of Ziehl-Neelsen staining further.

166

## 167 **Vasculopathy is evident in non-necrotic vessels of Buruli** 168 **ulcer lesions**

169 First, we closely analysed the phenotype of blood vessels in the defined regions of BU lesions  
170 using three well-known perivascular and/or endothelial cell markers: CD31, SMA and



171 thrombomodulin. Since our previous studies showed that both thrombomodulin and, to a  
172 lesser extent, CD31 could be depleted by mycolactone exposure [28], we took a conservative  
173 approach and identified vessels which stained positively for SMA, or at least one of  
174 thrombomodulin and/or CD31. Using this approach, a total of 908 vessels were identified in  
175 the pre-defined regions of the eight patient samples (median of 92.5 vessels per patient  
176 sample, range 18-253).

177

178 When vessels were categorised according to the expression of these three markers (any level  
179 of positive staining), thrombomodulin presence was found to vary widely, regardless of the  
180 lesion type or WHO Category. All the vessels in the pre-defined region of one patient displayed  
181 were TM<sup>+</sup> (Fig 1A), although for this patient the pre-defined region was very small and  
182 contained only 18 vessels (S1 Fig). In contrast, two patients had few vessels expressing  
183 thrombomodulin in the analysed areas, while other patients' samples showed intermediate  
184 degrees of positive staining (Fig 1A). Overall, in the pre-defined regions containing non-  
185 necrotic vessels, only 299 out of 908 (32.9%) had normal staining (TM<sup>+</sup> CD31<sup>+</sup> SMA<sup>+</sup>). The  
186 remaining vessels lacked one or more of the expected vessel markers, with the most common  
187 phenotypes being TM<sup>-</sup> CD31<sup>+</sup> SMA<sup>+</sup> (37.4%) and TM<sup>-</sup> CD31<sup>-</sup> SMA<sup>+</sup> (18.7%). Some of the singly  
188 positive SMA structures could potentially be sweat glands with vessel-like morphology.  
189 However, even if this is the case for a proportion of these solely SMA<sup>+</sup> structures, the data  
190 suggests a general vasculopathy in these BU lesions that precedes the emergence of  
191 coagulative necrosis.

192

193 In order to understand whether the previously described association between thrombomodulin  
194 depletion and fibrin deposition [28] is functionally linked, fibrin deposition was scored for each  
195 identified vessel in the defined regions, according to its degree of extension. Here, 852 vessels  
196 were trackable in analysed areas of tissue sections stained with fibrin, since not all vessels  
197 identified above could be found in subsequent sections. As reported previously [28], fibrin

198 staining was seen across the biopsies, both in the defined regions and in highly necrotic areas  
199 but varying in intensity and extent for each patient (S1 Fig). The fibrin was mostly evident as  
200 tissue deposition surrounding, rather than in, blood vessels (298 vs. maximum 20 vessels in  
201 the defined areas).

202

203 Scoring of the fibrin disposition around 329 TM<sup>+</sup> and 523 TM<sup>-</sup> vessels (where 0 is no staining,  
204 and 3 is fibrin evident continuously for >30  $\mu$ m from the vessel) showed thrombomodulin  
205 expression had no overall impact on fibrin levels (chi<sup>2</sup> vs normal staining pattern  $P = 0.2007$ ,  
206 Fig 1B). Hence, thrombomodulin depletion itself does not seem to be a good predictor of local  
207 fibrin deposition. However, while most vessels were fibrin-negative, in vessels lacking  
208 thrombomodulin expression the proportion with the highest fibrin score was increased  
209 compared to TM<sup>+</sup> vessels (13.0 vs. 7.3%, Fig 1B). Moreover, the fibrin intensity within 20  $\mu$ m  
210 of vessels lacking TM expression was much more variable than those where TM was detected  
211 (up to 79.0 vs. 45.8%, Fig 1C), suggesting the loss may aggravate fibrin formation in certain  
212 subgroup(s) of vessels. This is borne out by comparing the intensity of staining in fibrin-positive  
213 vessels, where TM<sup>-</sup> vessels had significantly higher levels of fibrin within 20  $\mu$ m.

214

## 215 **Primary haemostasis plays only a minor role in BU skin** 216 **lesions, perhaps due to mycolactone-depletion of von** 217 **Willebrand factor from endothelial cells**

218 Since loss of thrombomodulin does not explain all the fibrin disposition seen in BU patient  
219 lesions, other pathways that could lead to fibrin formation were explored. First, we examined  
220 the localisation of molecules involved in primary haemostasis [30]. vWF is the primary  
221 component of Weibel–Palade bodies, secretory granules that are released from endothelial  
222 cells in response to activation or injury [35]. In healthy skin, vWF was present in endothelial  
223 cells lining blood vessels as expected [36] (Fig 2A1-2 and S3A Fig). As others have observed  
224 [37, 38], there is a relatively high stromal background for vWF staining due to its presence in

225 serum. By contrast, in BU lesions, detection of endothelial vWF was frequently reduced (Fig  
226 2B1, black arrowheads) or staining was seen in the intravascular space instead (Fig 2B1-2,  
227 black stars); rarely, vWF remained detectable in the endothelium (Fig 2B3, black arrow).

228

229 One of vWF's primary roles is to capture activated platelets, thus providing a rich negatively  
230 charged surface for amplification of the blood coagulation cascade leading to fibrin formation.  
231 Activated platelets express platelet glycoprotein IIb/IIIa (CD41/CD61), as their main receptor  
232 for vWF and fibrinogen, and here we examined the expression of CD61, also known as integrin  
233  $\beta 3$  [39]. Surprisingly, considering the wide abundance of fibrin in the lesion, very little CD61  
234 staining was seen in BU lesions (Fig 2B4 and S1 Fig), even in areas with coagulative necrosis.  
235 This suggests a minor role, if any for primary haemostasis in lesion formation.

236

237 To consider this more closely, we analysed the colocalisation of CD61 and vWF in BU patient  
238 vessels. In the defined regions (Fig 2C1-6, 2D1-6), CD61 and vWF were barely detectable in  
239 vessels, despite strong fibrin staining in the vicinity (Fig 2C4 and 2D4, blue and purple arrows).  
240 In vessels that were positive for of least one of SMA, CD31 or thrombomodulin, none stained  
241 positively for CD61. In necrotic regions in the subcutis, CD61 staining was occasionally seen  
242 in areas where fibrin deposition was evident, in vessels that were CD31<sup>+</sup> and TM<sup>-</sup>, colocalising  
243 with vWF (Fig 2E1-6, red arrows).

244

245 We have already shown that platelet activation is not directly affected by mycolactone [28],  
246 and the CD61 presence did not correlate with vWF in non-necrotic vessels. Therefore, we  
247 postulated that this might be due to mycolactone-dependent depletion of vWF from endothelial  
248 cells, and there is some evidence to support this from these BU patient samples. Of 734  
249 trackable vessels in defined regions in BU lesions, only 24.8% retained a normal expression  
250 pattern, with their endothelial monolayer stained positively for vWF (Fig 2B3 and 2F upper

251 panel). Instead, nearly half (47.4%) had completely lost vWF staining (vWF<sup>-</sup>) (Fig 2B1, 2C6,  
252 2D6 and 2F upper panel). Intriguingly, 204 vessels (27.8%) displayed vWF staining within the  
253 lumen of microvessels, in the intravascular space (Fig 2B1-2 and 2F upper panel). This pattern  
254 of staining was particularly evident in BU patient punch biopsies in which the pre-defined areas  
255 were heavily infiltrated with immune cells (S1 Fig, outlined in blue), representing 52.5% of  
256 such vessels (Fig 2F, lower panel). However, fibrin scores were similar across all three  
257 phenotypes of vWF expression in vessels (chi<sup>2</sup> vs normal staining pattern  $P = 0.2882$  and  
258 0.1280 for intravascular and vWF<sup>-</sup>, respectively Fig 2F), suggesting that none of these  
259 phenotypes are directly related to fibrin formation.

260

261 Since vWF enters Weibel-Palade bodies via the secretory pathway and should be a Sec61-  
262 dependent protein [35], we reasoned that the widespread depletion of vWF in BU lesions might  
263 be related to the ability of the diffusible exotoxin mycolactone to inhibit the Sec61 translocon.  
264 Hence, we visualised vWF in cultured primary HDMECs and human umbilical vein endothelial  
265 cells (HUVECs) by immunofluorescence (Figs 2G and S3B Fig). Although the amount of vWF-  
266 positive granules (presumptive Weibel-Palade bodies) varied from cell to cell, these were  
267 greatly reduced after 24 hours exposure to mycolactone (Fig 2G). Furthermore, when we  
268 quantified the level of vWF in conditioned medium from HDMECs by enzyme-linked  
269 immunosorbent assay (ELISA), both basal and thrombin-induced vWF secretion was almost  
270 completely abolished following mycolactone exposure (Fig 2H).

271

## 272 **Extravascular tissue factor within BU lesions correlates to** 273 **pathogenic fibrin deposition**

274 Another potential trigger for fibrin generation is activation of the extrinsic coagulation cascade,  
275 initiated by TF. In the skin of healthy individuals, normal TF staining is found only in the  
276 epidermis and the adventitia of larger (but not smaller) blood vessels as expected (Fig 3A1-2  
277 and S4A Fig). This highly restricted expression pattern is vital to maintain intravascular fluidity,

278 due to its ability to rapidly catalyse activation of the coagulation cascade by binding Factor  
279 VII/VIIa. In BU patient lesions, TF staining was not confined to the sub-endothelium and was  
280 instead seen within the tissues in a complex, highly variable pattern between patients. For  
281 example, in one patient, TF was present at the edge of damaged area (S4C Fig) where  
282 extravasated erythrocytes had accumulated. Abnormal TF staining fell into one of four main  
283 categories. First, staining outside of the vessel basement membrane (BM) of larger vessels  
284 (Fig 3B5 and 3C5, red arrows). Second, in presumptive infiltrating cells, either demonstrating  
285 granular intracellular staining (Fig 3D5 and S4B Fig, black arrows) or intensively throughout  
286 each cell (Fig 3E5, black arrows). This pattern of staining was seen in both necrotic and in  
287 defined regions, and in the latter case was in regions that appeared to contain eosinophils  
288 based on Haematoxylin and eosin (H&E) staining (Fig 3E3, black arrowhead). Third, TF  
289 staining was found within the endothelial cells lining smaller vessels (Fig 3F5, orange arrow),  
290 which do not normally express this receptor. Lastly, some vessels contained some structures  
291 within the vessel lumen that could not be identified, yet stained strongly for TF (Fig 3G5, purple  
292 arrows). Approximately one quarter of vessels with this phenotype were in infiltrated regions  
293 (Fig 3G3).

294

295 With respect to TF-positive presumptive-infiltrating cells, these were observed within tissue  
296 rather than close to vessels. Granular intracellular staining was seen in 5 of the 8 BU patient  
297 biopsies, almost exclusively in the defined regions where they were between 2.2-89.9  $\mu\text{m}$   
298 away from the vessel BM. In most of these patients (4 out of 5) it occurred in areas displaying  
299 fibrin deposition (compare Figs 3D4 and 3D5). Infiltrating cells displaying intensive TF-positive  
300 staining throughout each cell body were seen in 6 of the 8 BU biopsies and always in regions  
301 of fibrin accumulation. This phenotype was more common in the necrotic subcutis (5 patients).  
302 In the one patient where it was seen in a defined region, the cells were 17.1-120.9  $\mu\text{m}$  away  
303 from the vessel BM.

304

305 Vessels in defined regions were tracked and classified according to their TF expression  
306 patterns. Of 830 trackable vessels, 18.2% showed normal TF expression in the adventitia, 45  
307 (5.4%) showed TF staining outside of the vessel BM, within the skin tissue, 63.3% displayed  
308 abnormal TF staining in the vessel endothelium, and 13.1% showed TF within the vessel  
309 lumen (Fig 3H). All abnormal expression patterns were associated with an increased chance  
310 of having the highest fibrin score. While this was not significantly different for vessels where  
311 TF staining was seen in the lumen ( $\chi^2$  vs normal staining pattern  $P = 0.5901$ ), it was distinct  
312 in vessels where the endothelium was TF<sup>+</sup> ( $\chi^2$  vs normal staining pattern  $P = 0.0014$ ). Most  
313 strikingly, whilst being relatively rare in the defined regions, vessels that displayed TF staining  
314 outside of BM were significantly more likely to have fibrin deposited in the surrounding tissue,  
315 ( $\chi^2$  vs normal staining pattern  $P < 0.0001$ , Fig 3H) and more likely to have fibrin that extended  
316 further from the vessel (82.22% exhibiting the highest fibrin score). Notably the coincidence of  
317 fibrin and TF outside the BM was often found where there were local signs of tissue necrosis  
318 by H&E staining (e.g. Fig 3C3), suggesting that fibrin-deposition may cause result directly in  
319 necrosis, presumably due to ischaemia.

320

## 321 **Mycolactone reduces the expression of tissue factor** 322 **pathway inhibitor in endothelial cells**

323 The interaction between TF and the 50 kDa blood-borne factor VIIa, and the subsequent  
324 triggering of the coagulation cascade leading to fibrin formation is normally prevented by a  
325 functional endothelial barrier which segregates bloodstream from the TF-containing  
326 subendothelium [30]. Normally, TF/factor VIIa activity is suppressed by TFPI, which is mostly  
327 expressed by vascular endothelium and megakaryocytes [33]. Endothelial cells predominantly  
328 express the membrane-associated TFPI splice variant lacking both the C-terminus and the  
329 third Kunitz-type inhibitory domain (isoform  $\beta$ ), but also express full-length TFPI (isoform  $\alpha$ ).  
330 Upon stimulation or heparin infusion, TFPI $\alpha$ , bound to cell-surface glycosaminoglycans  
331 through its C-terminus, can be secreted rapidly [40]. As fibrin deposition was found in BU

332 affected tissues and correlated to TF seen outside of vessel BM, we wondered whether TFPI  
333 expression might be affected by mycolactone. As we were unable to test this in the biopsies  
334 themselves, we investigated this *in vitro*. TFPI was rapidly depleted from HDMECs in response  
335 to mycolactone exposure with a decrease detectable after 8 hours by Western blot (Fig 4A);  
336 given that TFPI $\alpha$  and  $\beta$  have different levels of glycosylation and migrate with similar molecular  
337 mass on sodium dodecyl sulfate polyacrylamide gel electrophoresis [41], we couldn't  
338 distinguish between these isoforms. Quantification of this data demonstrated a 57.4%  
339 reduction of total TFPI after 8 hours of mycolactone exposure and further to 88.3% after  
340 24hours (Fig 4A). A similar decline was seen in conditioned medium, where the amount of  
341 TFPI secreted by HDMEC over 24 hours reduced from  $4.59\pm 0.18$  to  $0.74\pm 0.13$  ng/mL (Fig  
342 4B).

343

## 344 **Mycolactone-dependent vascular permeability as a** 345 **potential driver of coagulopathy in Buruli ulcer lesions**

346 Taken together the data from BU punch biopsies suggests that the expression of haemostatic  
347 markers on the vessel endothelium is not a reliable predictor of fibrin deposition close to that  
348 vessel. Instead, fibrin deposition in the tissue seems to arise locally and driven by TF  
349 expression that is uncontained within the stroma. To examine how uncontained TF may impact  
350 fibrin deposition in such a distinct phenotype, the staining intensity of TF and fibrin were  
351 quantified and the distance of the TF signal from the vessel BM were measured in these same  
352 vessels. There was no correlation between fibrin and TF staining intensity within 20  $\mu$ m ( $r = -$   
353  $0.1623$ ,  $P = 0.2869$ ) (Fig 5A). However, there was a positive correlation ( $r = 0.2981$ ,  $P =$   
354  $0.0467$ ) between fibrin intensity and the distance of TF<sup>+</sup> signal from the same analysed vessel  
355 BM (Fig 5B).

356

357 Generation of fibrin within tissue, a substantial distance away from vessels, resulting from  
358 extrinsic coagulation pathway activation would require large plasma glycoproteins to gain

359 access to the stromal compartment. We therefore asked whether mycolactone might induce  
360 changes to vascular permeability that could lead to a breakdown of vessel integrity *in vitro*.  
361 Hence, we evaluated the effect of mycolactone on the permeability of HDMEC monolayers to  
362 70 kDa FITC-labelled dextran in a transwell system. In line with our hypothesis, exposure to  
363 10 ng/mL mycolactone for 24 hours increased the permeability of the monolayer to  $33.1 \pm 6.2\%$   
364 of the value seen when cells were completely absent from the transwell (Fig 5C), equivalent  
365 to around one-third of that seen with interleukin-1 $\beta$  (IL-1 $\beta$ ), a known inducer of vascular  
366 permeability [42].

367  
368 We also wondered whether this mycolactone-dependent increase in permeability might extend  
369 to the lymphatic system, since BU can sometimes have an oedematous presentation. In  
370 human dermal lymphatic endothelial cells (HDLECs), a subpopulation of endothelial cells that  
371 actively participate in fluid balance and transport [43, 44], this phenotype was even more  
372 apparent. HDLECs and HDMECs had comparable half maximal inhibitory concentration to  
373 mycolactone (around 0.67 ng/mL, S5 Fig), but the response of lymphatic endothelial cells to  
374 mycolactone was more pronounced. Exposure to 10 ng/mL mycolactone for 24 hours  
375 increased the permeability of the monolayer to  $68.6 \pm 19.8\%$  of the value seen in empty wells  
376 (Fig 5D). In the same time window, 2.5 ng/mL mycolactone could potentiate this effect but to  
377 a lesser degree ( $26.7 \pm 2.8\%$ , Fig 5D).

378

## 379 **IL-1 $\beta$ aggravates mycolactone-driven endothelial** 380 **dysfunction**

381 Recent work showed that IL-1 $\beta$  can be induced by mycolactone-containing microvesicles and  
382 is found in *M. ulcerans*-infected tissues [45]. Since IL-1 $\beta$  has been long-known to repress  
383 thrombomodulin expression in endothelial cells by a transcriptional mechanism [46], and also  
384 induces vascular permeability [42], we wondered whether the presence of this alarm cytokine  
385 might exacerbate the effect of mycolactone on the microvasculature. First, we addressed



386 whether mycolactone's ability to suppress thrombomodulin expression in primary endothelial  
387 cells might be influenced by IL-1 $\beta$ , by exposing cells to a range of concentrations of  
388 mycolactone and/or IL-1 $\beta$ . As expected, exposure to either 10 ng/mL IL-1 $\beta$  or 2.5 ng/mL  
389 mycolactone alone for 24 hours led to a significant depletion in thrombomodulin protein level  
390 in both HDMECs (Fig 6A) and HDLECs (Fig 6B). Similar to our observations regarding  
391 vascular permeability, lymphatic endothelial cells were more sensitive to both stimuli, with  
392 >50% reduction in the presence of 0.6 ng/mL IL-1 $\beta$  ( $P = 0.0132$ ) or 1.25 ng/mL mycolactone  
393 ( $P = 0.0004$ ) (Fig 6B). Remarkably, this downward trend was more evident when the  
394 endothelial cells were co-exposed to non-saturating amounts of both agents (Fig 6A and B).  
395 For example, in HDMEC, while each stimulus alone resulted in ~55-75% depletion of  
396 thrombomodulin expression, it was barely detectable in endothelial cells exposed to both 2.5  
397 ng/mL mycolactone and 10 ng/mL IL-1 $\beta$ . In HDLEC, the combination of 0.625 ng/mL  
398 mycolactone and 0.6 ng/mL IL-1 $\beta$  suppressed thrombomodulin expression to the same extent  
399 as 10 ng/mL IL-1 $\beta$ . These effects appear to be additive rather than synergistic.

400

401 Since the additive effect was particularly evident in HDMECs, we investigated whether it might  
402 also influence vascular permeability in these cells. Here, we used a lower dose of IL-1 $\beta$ , which  
403 only slightly increased the permeability of monolayer after 24 hours ( $7.66 \pm 3.89\%$  of the value  
404 seen in an empty well, Fig 6C). Mycolactone had a dose-dependent effect on vascular  
405 permeability as before, and the additive effect of IL-1 $\beta$  was evident when there was 5 ng/mL  
406 mycolactone, increasing the permeability significantly from  $17.58 \pm 7.57\%$  to  $44.62 \pm 9.65\%$  ( $P$   
407 = 0.0021 vs. DMSO;  $P = 0.0268$  vs. mycolactone alone). This data suggests that even low  
408 amounts of IL-1 $\beta$  in infected tissues might have a further negative impact on haemostatic  
409 status and endothelial monolayer integrity where trace amounts of mycolactone are present.

## 410 Discussion

411 Coagulation is often considered as a frontline host defence response to infection due to  
412 trapping of invading bacteria clots [47]; however, some pathogens develop strategies to  
413 bypass or utilise clot architecture to gain access to host resources. For example, *Streptococci*  
414 generate streptokinase, a plasminogen activator mimic, that promotes fibrinolysis and thus  
415 has a positive impact on bacterial metastasis [48]. Coagulase-positive *staphylococci*, on the  
416 other hand, produce coagulase, which rapidly depletes fibrinogen from the plasma and blunts  
417 the phagocytic activity of neutrophils [49]. Malaria-infected erythrocytes cause the loss of  
418 EPCR and thrombomodulin in brain vessels, leading to subsequent fibrin deposition within the  
419 microvasculature [50], which impacts the severity of cerebral malaria [51]. In the case of BU,  
420 the skin lesions exhibit large-scale coagulative necrosis in the subcutaneous regions, a distinct  
421 pathological phenotype, which has been long associated with the biological effects of the  
422 exotoxin mycolactone as it diffuses through the infected tissue [52].

423

424 Cumulative reports with *in vitro* or *in vivo* assays have addressed how cell death can be  
425 potentiated in response to mycolactone, either directly via the activation of caspase-3,  
426 caspase-9 [53] or Bcl-2-like protein 11 [54] with resultant apoptosis, and/or via an integrated  
427 stress response leading to ATF4 activation [14, 15]. These pathways may also involve  
428 disruption of actin cytoskeleton [55]. More recently an indirect mechanism was proposed, via  
429 mycolactone's Sec61-dependent influence on coagulation control and resultant tissue  
430 ischemia [28]. However, to what extent coagulation is dysregulated in BU has been unclear.  
431 This present work demonstrates several abnormal phenotypes for haemostatic proteins in the  
432 dermal microvasculature of BU patients that includes: 1) loss of key endothelial proteins such  
433 as the endothelial adhesion molecule CD31, the anticoagulant thrombomodulin, and the  
434 platelet binding partner vWF, and 2) highly abnormal expression patterns of TF that suggest  
435 a loss of containment. These changes likely underpin the pathogenic fibrin deposition seen in  
436 the skin lesions and imply that infection with *M. ulcerans* may cause a localised, disturbed

437 haemostatic status. This conclusion is reinforced by *in vitro* data using primary endothelial  
438 cells, in which we show that mycolactone can potentiate vascular and lymphatic hyper-  
439 permeability. Moreover, mycolactone limits the expression, and secretion of, vWF and TFPI.

440

441 Mechanistically, a combination of mycolactone's action at the Sec61 translocon, and  
442 increased local concentration of IL-1 $\beta$ , likely explains the endothelial dysfunction seen in BU.  
443 Like the single-pass type I membrane proteins thrombomodulin and CD31 [28], the secretory  
444 proteins vWF and TFPI require Sec61-dependent co-translational translocation into the ER  
445 lumen to complete their biosynthesis, processes that are inhibited by mycolactone [24, 25]. In  
446 *in vitro* model systems, the mycolactone concentration is uniform, whereas in BU skin lesions  
447 the situation is more complicated, but where mycolactone is present at high enough  
448 concentrations, depletion of these Sec61-dependent molecules should also occur as the  
449 process is conserved amongst diverse cell types. The variations in endothelial marker  
450 expression seen in different specimens and sections from the same specimen may therefore  
451 reflect local variations in mycolactone concentration. However, while there is much evidence  
452 for mycolactone within BU lesions [10, 56], these currently lack the spatial resolution to  
453 understand exactly how much mycolactone is present at specific sites.

454

455 It is clear from our data that in the complex structure of the disordered skin in BU that there  
456 was less than expected correlation between loss of endothelial transmembrane proteins,  
457 based on Sec61 inhibition alone. For instance, while many vessels lost both thrombomodulin  
458 and vWF, some had lost expression of one marker but not the other. Since it was recently  
459 shown that IL-1 $\beta$  is present in BU skin lesions also with variable intensity across biopsy  
460 samples [45], we tested the hypothesis that this may add an additional layer of complexity in  
461 the *in vivo* setting. We showed that mycolactone and IL-1 $\beta$  have an additive effect *in vitro*,  
462 suggesting that the variation in marker expression could be caused by the cumulative effect  
463 of local mycolactone and IL-1 $\beta$ . In this context, it is also worth noting that the distance between

464 our serial tissue sections for these markers is 24  $\mu\text{m}$  inclusive and given the focal nature of  
465 the staining for the same markers across the section (see Fig S2A), this could also be a  
466 contributing factor.

467

468 These BU patients showed widespread changes to the localisation of vWF in skin punch  
469 biopsies, with only a minority of vessels in defined regions displaying a normal expression  
470 pattern. In healthy tissue, vWF is expressed solely in endothelial cells, and is found contained  
471 within organelles called Weibel-Palade bodies (WBPs), which also contain a variety of other  
472 components regulating inflammation as well as vascular modulators [57]. Endothelial cells  
473 respond rapidly upon activation by a variety of so-called secretagogues to exocytose their  
474 WBP, upon which the vWF forms multimeric strings of molecules whose normal function is to  
475 capture platelets [58]. It is possible that WBP exocytosis explains the pattern we observed,  
476 particularly in immune cell infiltrated regions, where vWF was lost from endothelial cells and  
477 instead observed in the adjacent intravascular space. This pattern of expression has been  
478 previously reported in the dermal vasculature of patients with malignant melanoma [59] as  
479 well as alveolar septa and large blood vessels of patients with malaria-associated acute  
480 respiratory distress syndrome [37]. In melanoma vasculatures, CD42<sup>+</sup> platelet aggregates  
481 were also seen bound to intravascular vWF fibres [59], due to an endothelial glycocalyx  
482 shedding-dependent process [60]. We did not observe platelet aggregates in these vessels in  
483 our BU patients, although we cannot completely rule out that this is a technical limitation of  
484 the antibody used to detect them [61].

485

486 Another haemostatic factor with a grossly abnormal expression pattern was the extrinsic  
487 pathway initiator TF, which plays a critical role in both fibrin generation and wound repair [62].  
488 Exposure of TF to blood is sufficient to initiate clotting, due to its cofactor activity in the  
489 activation of factors IXa and Xa by factor VIIa [63]. Consequently, TF expression in the skin is  
490 normally restricted to the epidermis and the adventitia surrounding larger vessels as a so-

491 called “haemostatic envelope” [63], and its activity is usually tightly regulated by an inhibitor,  
492 TFPI [33]. Changes in TF expression have been reported in many inflammatory thrombotic  
493 conditions [62, 64], as well as in infections such as tuberculosis [65, 66]. Myeloid cells do not  
494 normally express TF, but during *M. tuberculosis* infection, TF expression is observed in  
495 macrophages along with conspicuous fibrin deposition within granulomas [66, 67]. Mice  
496 genetically altered to have low TF expression [65] or TF deficiency in myeloid cells [67] do not  
497 show these changes.

498

499 Whether the endothelium can be a cellular source of the TF in pathogenic conditions remains  
500 highly controversial [62, 68]. It is well-established that inflammatory agents such as  
501 lipopolysaccharide, oxidized low density lipoprotein and IL-1 $\beta$  can induce TF mRNA and  
502 protein expression in monocytes and macrophages both *in vitro* and *in vivo* [69-71]. On the  
503 other hand, while endothelial cells can be induced to express TF *in vitro* in response to  
504 lipopolysaccharide and IL-1 $\beta$  [42, 72, 73] the evidence that this takes place *in vivo* as part of  
505 a pathophysiological process is not so clear. For instance, endothelial-specific TF-knockout  
506 mice display little influence over pathogenesis in a range of disease models [62, 74]. Much  
507 evidence supports a view that procoagulant TF always arises via activated mononuclear cells  
508 and that the detection of TF in other cells is a consequence of microparticle uptake [62, 75].  
509 Indeed, early reports that eosinophils could express TF following activation [76] were more  
510 recently shown to be explained by their uptake of monocyte-derived microparticles [68]. While  
511 this is a highly complex and also controversial area, many cell types including endothelial cells,  
512 platelets, and monocytes/macrophages have all been shown to be capable of producing TF-  
513 bearing microparticles *in vitro*, but monocyte-derived microparticles have been shown to be  
514 the most thrombogenic [77]. As well as providing the extrinsic clotting pathway initiator TF,  
515 microparticles are also thought to promote coagulation by providing a rich negatively charged  
516 surface for the amplification of the coagulation cascade at their location [62]. The presence of  
517 circulating TF-bearing microparticles has been reported in patients with cancer-associated

518 thrombosis [78], venous thromboembolism [79], cardiac bypass surgery [80], Behçet's disease  
519 [81] and sepsis [82].

520

521 In the BU patients we investigated, epidermal expression of TF was not altered, but within the  
522 dermis and subcutis extremely disordered TF expression was observed. In stark contrast to  
523 healthy skin, even in the pre-defined regions containing non-necrotic vessels, TF was detected  
524 in the endothelial cells of >60% of tracked vessels, as well as in infiltrating cells in five patients  
525 with either granular, or one patient with whole-cell, staining. This finding, reminiscent of  
526 inflammatory thrombotic conditions, such as sepsis and atherosclerosis [62, 64, 68], was  
527 surprising because of mycolactone's well-characterised immunosuppressive and anti-  
528 inflammatory effects [56]. Once again, IL-1 $\beta$  may play an important role here. We speculate  
529 that the TF<sup>+</sup> endothelial cells and presumptive eosinophils we observed could have arisen by  
530 uptake of TF-bearing microparticles induced by IL-1 $\beta$  within the lesions. It is unlikely that TF  
531 in the endothelium has much influence over disease progression in these BU patients, as fibrin  
532 deposition was little altered around these vessels even when the anticoagulant  
533 thrombomodulin was also lost from the endothelial cell surface. On the other hand, we  
534 observed TF<sup>+</sup> cells (presumably eosinophils) in necrotic and, more rarely, regions of BU  
535 lesions containing plentiful non-necrotic vessels, where fibrin was seen intensively in tissues.  
536 Notably, eosinophils have also been reported as the cellular source of TF seen in another skin  
537 condition, chronic urticaria [83]. It is also possible that some of the infiltrating TF<sup>+</sup> cells we  
538 observed are activated macrophages that have been induced to express TF. *M. ulcerans*  
539 infection is known to include a phase where macrophages are transiently infected with bacteria  
540 [84], and the death of these cells due to the cytotoxic effects of mycolactone could conceivably  
541 be another source of microparticles. Whether microparticles of any origins play an important  
542 role in BU will be the subject of future investigations.

543

544 The strongest association we observed with fibrin deposition was diffuse TF staining extending  
545 away from larger vessels, up to 200  $\mu\text{m}$  into tissue. A key question that arose was; how do TF  
546 and the other plasma clotting factors required to produce thrombin and consequently process  
547 fibrinogen to fibrin access these sites? Using an *in vitro* vascular permeability assay, we  
548 showed that mycolactone potentiates the passage of 70 kDa-size dextran through monolayers  
549 of both HDMECs and HDLECs. Given that adhesion molecules such as CD31 [85],  
550 thrombomodulin [86, 87] and vascular endothelial cadherin are essential regulators for  
551 endothelial tight junctions, and these proteins are downregulated by mycolactone [28], a  
552 disturbed endothelial physical barrier between plasma and tissue could be an unavoidable  
553 phenotype in BU. A leaky vasculature is well-established to result in increased immune cell  
554 invasion, as well as allowing plasma components and fluids to enter tissue [88, 89]. Hence,  
555 the disrupted physical barrier may initiate a clotting cascade as blood-borne clotting factors  
556 engage with their sub-endothelium located binding partners or activators [90].

557

558 Inflammatory cytokines are known to affect both microvascular and lymphatic endothelial  
559 barriers and augment vascular permeability [88, 91], and this can cause tissue oedema in  
560 many disease conditions [29, 88, 91]. In BU, oedematous forms are seen in around 5% of  
561 patients [92]. Further work will be required to establish how early in the infection process  
562 vascular permeability increases, and to understand whether it has a direct impact on *M.*  
563 *ulcerans* growth. Mycolactone's effect on vascular permeability *in vitro* occurred much earlier  
564 (within 24 hours) than its cytotoxic effects (more than 72 hours in HDMECs) and at an  
565 extremely low dose (10 ng/mL), even lower in the presence of small amounts of IL-1 $\beta$ .  
566 Furthermore, while increased vascular permeability is a common strategy used by innate host  
567 defence systems to fight against invading microorganisms, many pathogens also target cell-  
568 cell junctions in order to cross the barrier and colonise in tissues. Interestingly, *Mycobacterium*  
569 *marinum*, a close genetic relative of *M. ulcerans*, targets vascular integrity to aid its  
570 multiplication in granulomas [89].

571

572 Taken together, both our cell-based studies and histopathological analysis in patient  
573 specimens illustrate a hypercoagulative microenvironment that develops during BU disease  
574 progression. It seems likely that the fibrin deposition seen in BU skin punch biopsies is not  
575 driven by platelet aggregation; instead, it is likely to be the consequence of factor VIIa  
576 engaging with sub-endothelial TF as the endothelial cell monolayer integrity is disturbed,  
577 exacerbated by the loss of its natural inhibitor TFPI. We have not yet analysed any potential  
578 contribution of the intrinsic clotting pathway; therefore, this cannot be excluded. A correct  
579 balance of the TF-driven coagulation cascade and subsequent fibrin formation is critical in  
580 wound healing [93]. Hence, application of anticoagulants along with antibiotics could help  
581 neutralise the pro-thrombotic phenotype seen in BU patient skin lesions, and ultimately  
582 improve healing rate. Of note, complementary anticoagulant heparin alongside standard anti-  
583 tubercular antibiotics treatment has been previously employed to treat a case of facial BU. In  
584 this patient, facial oedema was reversed by heparin intravenous injection [94], suggesting  
585 lowering haemostatic status may attenuate BU disease progression.



## 586 **Materials and Methods**

587

### 588 **Ethics statement**

589 Ethical approval for analysing BU patient punch biopsies was obtained from the  
590 Ethikkommission beider Basel, Basel, Switzerland and the provisional national ethical review  
591 board of the Ministry of Health Benin (N IRB00006860) as well as from the Cameroon National  
592 Ethics Committee and the Ethics Committee of the Heidelberg University Hospital, Germany  
593 (ISRCTN72102977). A favourable ethical opinion for analysing normal human skin was given  
594 by Faculty of Health and Medical Science Ethics Committee of the University of Surrey (1174-  
595 FHMS-16). The normal human skin samples were collected by the Whiteley Clinic, Guildford,  
596 Surrey or were purchased from AMS Biotechnology. Written informed consent was obtained  
597 from adult patients or the guardians of child patients. The research related to human tissues  
598 complies with the ethical processes of University of Surrey.

599

### 600 **Histological analysis of human skin samples**

601 Buruli ulcer punch biopsies (4 mm) were collected previously [95] and reanalysed for the  
602 current study. The biopsies from 4 male and 4 female patients included lesions on both the  
603 upper and lower extremities, from all WHO lesion categories [1]. Clinical features of these  
604 patients are summarised in Table 1. In BU patients displaying ulcerated lesions, punch  
605 biopsies were taken 1 cm inside the outer margin of the induration surrounding the ulcer.  
606 Otherwise, punch biopsies were collected from the non-ulcerated centre of the skin lesions.  
607 After removal, tissues were fixed in 10% neutral buffered formalin, transported, embedded in  
608 paraffin and sectioned. The normal human skin tissue blocks were made from 4 mm punch  
609 biopsies collected by The Whiteley Clinic or surgical removal specimens (< 1cm<sup>2</sup>) collected by  
610 AMS Biotechnology-collaborated research clinical centres.

611

612 Nine serial tissue sections of each patient were (immuno-)histochemically stained in the  
613 following order: haematoxylin-eosin, fibrin, thrombomodulin (CD141), CD61, CD31 (Platelet  
614 endothelial cell adhesion molecule; PECAM-1), SMA (perivascular cell marker), Ziehl-  
615 Neelsen, TF and vWF. For immunohistochemical staining, 5- $\mu$ m skin tissue sections were  
616 deparaffinised, endogenous peroxidase quenched, epitope unmasked (either in preheated pH  
617 6 citrate buffer or treated with proteinase K, DAKO) and blocked with normal horse serum  
618 (Vector Laboratories). The tissue sections were incubated with primary antibody overnight at  
619 4°C and biotin-conjugated horse anti-mouse/ rabbit IgG (Vector Laboratories) for 30 minutes  
620 at room temperature. Primary antibodies were as follows: CD31 (M0823, DAKO),  
621 thrombomodulin (M0617, DAKO), SMA (NCL-SMA, Novocastra), CD61 (M0753, DAKO), vWF  
622 (ab6994, Abcam), TF (TF218; generous gift from Professor Wolfram Ruf, Scripps Research  
623 Institute) and Fibrin (59D8 [96]; generous gift from Professor Charles Esmon, Oklahoma  
624 Medical Research Foundation). Staining was performed using VECTASTAIN Elite ABC kit and  
625 Vector NovaRED peroxidase substrate (Vector Laboratories). Counterstaining was performed  
626 with Shandon Harris Haematoxylin (Thermo Fisher Scientific). Anti-TF and vWF antibodies  
627 and their respective matched isotype controls were introduced to healthy skin tissue slides to  
628 rule out unspecific signals. High resolution images of all slides were scanned using either  
629 Aperio slide scanner (Leica Biosystems), Panoramic digital slide scanners (3DHISTECH) or  
630 Hamamatsu slide photometry system (Hamamatsu Photonics). Scanned images were further  
631 analysed using ImageScope software (Leica Biosystems) or CaseViewer (3DHISTECH). In  
632 some cases, photographs were taken with Micropix microscope camera (acquisition software  
633 Cytocam) attached to a Yenway CX40 laboratory microscope (Micropix).

634

## 635 **Vessel identification and marker analysis**

636 Regions of BU punch biopsy samples containing as many non-necrotic blood vessels as  
637 possible were defined by a pathologist prior to the start of analysis. This decision was made  
638 based on the number of blood vessels present that were positive for SMA or CD31 and

639 whether there was any submacroscopic appearance of coagulative necrosis present in the  
640 corresponding H&E section. Two patient biopsies showed two distinct regions that contained  
641 plentiful non-necrotic blood vessels, therefore a total of ten representative areas were  
642 analysed for each biomarker. Once the regions were chosen, all blood vessels within them  
643 were analysed, regardless of whether nearby tissue displayed local signs of necrosis, in order  
644 to facilitate an unbiased analysis. Throughout this manuscript, we refer to these as “pre-  
645 defined” regions. Vessels within these pre-defined regions were initially identified by  
646 morphology and positive staining for SMA using the region of interest (ROI) tool on NIS  
647 Elements Basic Research (Nikon, Tokyo, Japan) (version 4.6). This allowed for the same  
648 vessels to be easily identified in the other sections. Any structure that had vessel morphology  
649 and that stained positively for the known endothelial markers CD31, thrombomodulin, or vWF  
650 in their corresponding sections were also identified and then tracked in the corresponding  
651 sections. Sweat glands stain for SMA, but do not have endothelium and do not stain for CD31,  
652 thrombomodulin or vWF [97, 98], therefore the morphology of singly SMA<sup>+</sup> structures were  
653 carefully considered before assigning them as vessels. Fibrin deposition and TF expression  
654 pattern around these vessels, if identifiable, was categorised. Note that not every vessel could  
655 be identified within all sections, therefore the number of vessels analysed always represents  
656 the number that could be identified through all the relevant sections, and therefore varies from  
657 analysis to analysis.

658

659 To analyse fibrin deposition that was largely seen within the tissues, two different approaches  
660 were taken. First, the distance that fibrin staining extended from the basement membrane was  
661 categorised based on measurements taken with Aperio ImageScope (version 12.3.3). Vessels  
662 with no fibrin staining within 20  $\mu\text{m}$  were scored as 0. Fibrin-positive vessels received  
663 increasing scores the further the staining extended (1; <20  $\mu\text{m}$  radius, 2; 20-30  $\mu\text{m}$  radius, 3;  
664 >30  $\mu\text{m}$  radius). Second, fibrin staining around each vessel was quantified using the calibrated  
665 ruler tool of NIS Elements Basic Research (version 4.6 and 5.21.01). Here, the threshold for

666 positive staining was first defined within random images, which was then applied to all vessels.  
667 Then, a 20  $\mu\text{m}$  area around all vessels was measured and traced again with the ROI tool. The  
668 area of each original vessel was subtracted from the area of its 20  $\mu\text{m}$  radius in order to give  
669 the area in which fibrin staining was to be quantified. Any staining within this was then  
670 calculated as a percentage of the 20  $\mu\text{m}$  area around each vessel.

671

672 To analyse the unusual TF staining pattern observed, TF staining intensity within 20  $\mu\text{m}$  was  
673 quantified as above for fibrin using the calibrated ruler tool of NIS Elements Basic Research  
674 (version 5.21.01). In addition, the distance that the TF signal extended from the individual  
675 vessel's basement membrane was measured by CaseViewer (version 2.2).

676

## 677 **Reagents**

678 Synthetic mycolactone A/B (generous gift of Professor Yoshito Kishi, Harvard University) [99]  
679 and its solvent control dimethyl sulfoxide (DMSO, Sigma) were used in cell-based studies.  
680 Human recombinant IL-1 $\beta$  was from Gibco.

681

## 682 **Cell culture and treatment**

683 Primary human dermal microvascular endothelial cells (HDMEC; LONZA), human umbilical  
684 vein endothelial cells (HUVECs, PromoCell) and human dermal lymphatic endothelial cells  
685 (HDLEC; PromoCell) from two donors were used and cultured according to manufacturer's  
686 recommendation in Endothelial cell growth medium MV2 (PromoCell). Subconfluent cells were  
687 treated with either 10 ng/mL mycolactone or DMSO equivalent to mycolactone dose for 24 hrs  
688 or as indicated in figure legend.

689

## 690 **Vascular permeability assay**

691 Endothelial cells were seeded on cell culture inserts containing 0.4 (Millipore) or 1  $\mu\text{m}$  pores  
692 (Falcon) with a polyethylene terephthalate membrane. Cells were treated as indicated, into  
693 both the insert and receiver wells. After 24 hrs, fluorescein isothiocyanate (FITC)-conjugated  
694 dextran (70 kDa, Millipore) was applied to each insert for 20 minutes. The fluorescence  
695 intensity of the solution in the lower chambers was then assessed by a fluorescent plate reader  
696 (FLUOstar Omega, BMG Labtech) with excitation/ emission wavelength at 485/ 530 nm.  
697 Fluorescence intensity was normalised to untreated control wells with an intact monolayer of  
698 endothelial cells (minimum) and expressed as a percentage of subtracted value obtained from  
699 wells where the insert had no cells (maximum).

700

## 701 **Cell viability assay**

702 Endothelial cells ( $4 \times 10^3$  cells) were seeded onto 96-well plates and treated with a variety of  
703 doses of mycolactone the following day. Serial dilutions of mycolactone from 50 to 0.098  
704 ng/mL or solvent control equivalent to highest mycolactone dose (0.1% DMSO) was applied  
705 to the cells; on the fifth day viability was assayed using alamarBlue Cell Viability Reagent  
706 (Invitrogen) with excitation/ emission wavelength at 560/ 590 nm by a plate reader (FLUOstar  
707 Omega, BMG Labtech). Values were normalised to the control wells treated with DMSO and  
708 are presented as survival rate (%).

709

## 710 **Immunochemical analysis**

711 Western blot analysis was carried out using standard techniques, following cell lysis with 1X  
712 RIPA buffer (Sigma) supplied with proteinase inhibitor cocktail (Sigma), separation by  
713 electrophoresis on 10% polyacrylamide gels and transfer to PVDF membranes (ThermoFisher  
714 Scientific). Antibodies used were TM (sc-13164, Santa Cruz), TFPI (AF2974, R&D Systems)  
715 and GAPDH (AM4300, Ambion). Immunofluorescence staining was performed on

716 paraformaldehyde-fixed cells after permeabilising with 0.5% Triton X-100 for 2 minutes.  
717 Antibodies used were vWF (ab6994, abcam) and Alexa Fluor 488 goat anti-rabbit IgG (H+L)  
718 (ThermoFisher Scientific). Nuclei were visualised with DAPI. Images were acquired with Nikon  
719 A1M confocal laser scanning unit attached to an Eclipse Ti-E microscope.

720

721 To assess the TFPI protein level in conditioned medium, an in-house ELISA was performed.  
722 In brief, samples or TFPI recombinant protein standards (ranging from 1000 to 8 ng/mL, 2974-  
723 PI. R&D Systems) were coated onto immunoplates (MaxiSorp, Nunc). Following overnight  
724 incubation, individual wells were blocked with 1% bovine serum albumin. Antibodies used  
725 were TFPI (AF2974, R&D Systems), HRP Rabbit anti-goat IgG (H+L), and Avidin anti-HRP  
726 (Invitrogen). The reaction was developed with 3, 3', 5, 5'-tetramethylbenzidine substrate  
727 (Invitrogen), stopped by 1M H<sub>2</sub>SO<sub>4</sub> and read at 450 nm by a plate reader (FLUOstar Omega,  
728 BMG Labtech).

729 To determine the effect of mycolactone on the release of vWF from Weibel-Palade bodies,  
730 HDMECs were pre-incubated with DMSO or 7.8ng/mL mycolactone for 24 hours, washed  
731 twice with serum free medium, then stimulated with 2 U/mL thrombin for 10 minutes. vWF  
732 protein levels were then quantified using an in-house vWF ELISA. Anti-human vWF antibody  
733 (A0082, Dako) was coated onto immunoplates overnight at 4°C and blocked with 2% BSA in  
734 PBS for 1 hour at room temperature. After blocking, the plate was washed three times with  
735 wash buffer (0.05% (v/v) Tween-20 in PBS), samples and standards (NIBSC) ranging from  
736 1000 mIU/mL - 4 mIU/mL were added to the wells and the plate was incubated at room  
737 temperature for 2 hours. Then, vWF was detected with HRP-conjugated rabbit anti-human  
738 vWF (P0226, Dako) followed by 3, 3', 5, 5'-tetramethylbenzidine substrate (Invitrogen),  
739 stopped by 1M H<sub>2</sub>SO<sub>4</sub> and read at 450 nm by a plate reader (FLUOstar Omega, BMG  
740 Labtech).

741

## 742 **Statistical analysis**

743 Statistical analysis was carried out using GraphPad Prism version 8 (San Diego, USA).  
744 Categorical data of analysed vessels was accessed using Chi-square test of association.  
745 Yate's correction for continuity was introduced to TF categorical data set as some observed  
746 values were below 5. Fibrin intensity per TM<sup>+</sup> or TM<sup>-</sup> vessel was assessed using Mann Whitney  
747 *U* non-parametric test. Fibrin intensity versus TF intensity or distance to BM per vessel with  
748 TF seen outside of BM was assessed using D'Agostino-Pearson normality test; as data set  
749 displayed a non-Gaussian distribution, correlation used the method of Spearman. Data  
750 otherwise was accessed using a one-way ANOVA and Dunnett's multi-comparison test.  
751 Unless otherwise indicated, statistical comparison for *in vitro* assays was vs DMSO-treated  
752 controls.

753

## 754 **Acknowledgments**

755 We would like to thank Lucia Lozano White (University of Surrey) for preparing tissue sections  
756 from healthy human skin tissue blocks, Dr Yoshito Kishi (Harvard University, USA) for the gift  
757 of synthetic mycolactone A/B, Prof Wolfram Ruf (Scripps Research Institute) and Prof Charles  
758 Esmon (Oklahoma Medical Research Foundation) for antibodies against TF and  
759 thrombomodulin, respectively. We thank Dr Belinda Hall and Dr Jane Newcombe for critical  
760 reading of the manuscript and Prof Mark Wansbrough-Jones (St Georges University of  
761 London) for helpful discussions leading to the testing of lymphatic endothelial cells.

## 762 References

- 763 1. WHO BU. Buruli ulcer. Situation and trends: World Health Organization; 2019  
764 [updated 16.09.2019]. Available from:  
765 [https://www.who.int/gho/neglected\\_diseases/buruli\\_ulcer/en/](https://www.who.int/gho/neglected_diseases/buruli_ulcer/en/).
- 766 2. Yotsu RR, Suzuki K, Simmonds RE, Bedimo R, Ablordey A, Yeboah-Manu D, et al.  
767 Buruli Ulcer: a Review of the Current Knowledge. *Curr Trop Med Rep*. 2018;5(4):247-  
768 56.
- 769 3. Simpson H, Deribe K, Tabah EN, Peters A, Maman I, Frimpong M, et al. Mapping the  
770 global distribution of Buruli ulcer: a systematic review with evidence consensus.  
771 *Lancet Glob Health*. 2019;7(7):e912-e22.
- 772 4. Agbenorku P, Edusei A, Agbenorku M, Diby T, Nyador E, Nyamuame G, et al. Buruli-  
773 ulcer induced disability in Ghana: a study at Apromase in the Ashanti region. *Plast*  
774 *Surg Int*. 2012;2012:752749.
- 775 5. Simpson C, O'Brien DP, McDonald A, Callan P. *Mycobacterium ulcerans* infection:  
776 evolution in clinical management. *ANZ J Surg*. 2013;83(7-8):523-6.
- 777 6. O'Brien DP, Friedman ND, McDonald A, Callan P, Hughes A, Walton A, et al. Wound  
778 healing: Natural history and risk factors for delay in Australian patients treated with  
779 antibiotics for *Mycobacterium ulcerans* disease. *PLoS Negl Trop Dis*.  
780 2018;12(3):e0006357.
- 781 7. Lunn HF, Connor DH, Wilks NE, Barnley GR, Kamunvi F, Clancey JK, et al. Buruli  
782 (Mycobacterial) Ulceration in Uganda. (a New Focus of Buruli Ulcer in Madi District,  
783 Uganda): Report of a Field Study. *East Afr Med J*. 1965;42:275-88.
- 784 8. Silva MT, Portaels F, Pedrosa J. Pathogenetic mechanisms of the intracellular  
785 parasite *Mycobacterium ulcerans* leading to Buruli ulcer. *Lancet Infect Dis*.  
786 2009;9(11):699-710.
- 787 9. Ruf MT, Steffen C, Bolz M, Schmid P, Pluschke G. Infiltrating leukocytes surround  
788 early Buruli ulcer lesions, but are unable to reach the mycolactone producing  
789 mycobacteria. *Virulence*. 2017;8(8):1918-26.
- 790 10. George KM, Chatterjee D, Gunawardana G, Welty D, Hayman J, Lee R, et al.  
791 Mycolactone: a polyketide toxin from *Mycobacterium ulcerans* required for virulence.  
792 *Science*. 1999;283(5403):854-7.
- 793 11. Pimsler M, Sponsler TA, Meyers WM. Immunosuppressive properties of the soluble  
794 toxin from *Mycobacterium ulcerans*. *J Infect Dis*. 1988;157(3):577-80.
- 795 12. Stinear TP, Mve-Obiang A, Small PL, Frigui W, Pryor MJ, Brosch R, et al. Giant  
796 plasmid-encoded polyketide synthases produce the macrolide toxin of  
797 *Mycobacterium ulcerans*. *Proc Natl Acad Sci U S A*. 2004;101(5):1345-9.
- 798 13. George KM, Pascopella L, Welty DM, Small PL. A *Mycobacterium ulcerans* toxin,  
799 mycolactone, causes apoptosis in guinea pig ulcers and tissue culture cells. *Infect*  
800 *Immun*. 2000;68(2):877-83.
- 801 14. Ogbechi J, Hall BS, Sbarrato T, Taunton J, Willis AE, Wek RC, et al. Inhibition of  
802 Sec61-dependent translocation by mycolactone uncouples the integrated stress  
803 response from ER stress, driving cytotoxicity via translational activation of ATF4. *Cell*  
804 *Death Dis*. 2018;9(3):397.
- 805 15. Morel JD, Paatero AO, Wei J, Yewdell JW, Guenin-Mace L, Van Haver D, et al.  
806 Proteomics Reveals Scope of Mycolactone-mediated Sec61 Blockade and Distinctive  
807 Stress Signature. *Mol Cell Proteomics*. 2018;17(9):1750-65.
- 808 16. Coutanceau E, Decalf J, Martino A, Babon A, Winter N, Cole ST, et al. Selective  
809 suppression of dendritic cell functions by *Mycobacterium ulcerans* toxin mycolactone.  
810 *J Exp Med*. 2007;204(6):1395-403.
- 811 17. Coutanceau E, Marsollier L, Brosch R, Perret E, Goossens P, Tanguy M, et al.  
812 Modulation of the host immune response by a transient intracellular stage of  
813 *Mycobacterium ulcerans*: the contribution of endogenous mycolactone toxin. *Cell*  
814 *Microbiol*. 2005;7(8):1187-96.



- 815 18. Torrado E, Adusumilli S, Fraga AG, Small PL, Castro AG, Pedrosa J. Mycolactone-  
816 mediated inhibition of tumor necrosis factor production by macrophages infected with  
817 *Mycobacterium ulcerans* has implications for the control of infection. *Infect Immun*.  
818 2007;75(8):3979-88.
- 819 19. Pahlevan AA, Wright DJ, Andrews C, George KM, Small PL, Foxwell BM. The  
820 inhibitory action of *Mycobacterium ulcerans* soluble factor on monocyte/T cell  
821 cytokine production and NF-kappa B function. *J Immunol*. 1999;163(7):3928-35.
- 822 20. Simmonds RE, Lali FV, Smallie T, Small PL, Foxwell BM. Mycolactone inhibits  
823 monocyte cytokine production by a posttranscriptional mechanism. *J Immunol*.  
824 2009;182(4):2194-202.
- 825 21. Hall BS, Hill K, McKenna M, Ogbечи J, High S, Willis AE, et al. The pathogenic  
826 mechanism of the *Mycobacterium ulcerans* virulence factor, mycolactone, depends  
827 on blockade of protein translocation into the ER. *PLoS Pathog*.  
828 2014;10(4):e1004061.
- 829 22. Gerard SF, Hall BS, Zaki AM, Corfield KA, Mayerhofer PU, Costa C, et al. Structure  
830 of the Inhibited State of the Sec Translocon. *Mol Cell*. 2020;79(3):406-15 e7.
- 831 23. Baron L, Paatero AO, Morel JD, Impens F, Guenin-Mace L, Saint-Auret S, et al.  
832 Mycolactone subverts immunity by selectively blocking the Sec61 translocon. *J Exp*  
833 *Med*. 2016;213(13):2885-96.
- 834 24. McKenna M, Simmonds RE, High S. Mechanistic insights into the inhibition of Sec61-  
835 dependent co- and post-translational translocation by mycolactone. *J Cell Sci*.  
836 2016;129(7):1404-15.
- 837 25. McKenna M, Simmonds RE, High S. Mycolactone reveals the substrate-driven  
838 complexity of Sec61-dependent transmembrane protein biogenesis. *J Cell Sci*.  
839 2017;130(7):1307-20.
- 840 26. Grotzke JE, Kozik P, Morel JD, Impens F, Pietrosevoli N, Cresswell P, et al. Sec61  
841 blockade by mycolactone inhibits antigen cross-presentation independently of  
842 endosome-to-cytosol export. *Proc Natl Acad Sci U S A*. 2017;114(29):E5910-E9.
- 843 27. Lang S, Pfeffer S, Lee PH, Cavalie A, Helms V, Forster F, et al. An Update on Sec61  
844 Channel Functions, Mechanisms, and Related Diseases. *Front Physiol*. 2017;8:887.
- 845 28. Ogbечи J, Ruf MT, Hall BS, Bodman-Smith K, Vogel M, Wu HL, et al. Mycolactone-  
846 Dependent Depletion of Endothelial Cell Thrombomodulin Is Strongly Associated with  
847 Fibrin Deposition in Buruli Ulcer Lesions. *PLoS Pathog*. 2015;11(7):e1005011.
- 848 29. Cahill PA, Redmond EM. Vascular endothelium - Gatekeeper of vessel health.  
849 *Atherosclerosis*. 2016;248:97-109.
- 850 30. Yau JW, Teoh H, Verma S. Endothelial cell control of thrombosis. *BMC Cardiovasc*  
851 *Disord*. 2015;15:130.
- 852 31. Smith SA, Travers RJ, Morrissey JH. How it all starts: Initiation of the clotting  
853 cascade. *Crit Rev Biochem Mol Biol*. 2015;50(4):326-36.
- 854 32. Stearns-Kurosawa DJ, Kurosawa S, Mollica JS, Ferrell GL, Esmon CT. The  
855 endothelial cell protein C receptor augments protein C activation by the thrombin-  
856 thrombomodulin complex. *Proc Natl Acad Sci U S A*. 1996;93(19):10212-6.
- 857 33. Wood JP, Ellery PE, Maroney SA, Mast AE. Biology of tissue factor pathway  
858 inhibitor. *Blood*. 2014;123(19):2934-43.
- 859 34. Marcum JA, Atha DH, Fritze LM, Nawroth P, Stern D, Rosenberg RD. Cloned bovine  
860 aortic endothelial cells synthesize anticoagulant active heparan sulfate  
861 proteoglycan. *J Biol Chem*. 1986;261(16):7507-17.
- 862 35. McCormack JJ, Lopes da Silva M, Ferraro F, Patella F, Cutler DF. Weibel-Palade  
863 bodies at a glance. *J Cell Sci*. 2017;130(21):3611-7.
- 864 36. Koerdt S, Rohleder NH, Rommel N, Nobis C, Stoeckelhuber M, Pigorsch S, et al. An  
865 expression analysis of markers of radiation-induced skin fibrosis and angiogenesis in  
866 wound healing disorders of the head and neck. *Radiat Oncol*. 2015;10:202.
- 867 37. Pham TT, Punsawad C, Glaharn S, De Meyer SF, Viriyavejakul P, Van den Steen  
868 PE. Release of endothelial activation markers in lungs of patients with malaria-  
869 associated acute respiratory distress syndrome. *Malar J*. 2019;18(1):395.

- 870 38. Miettinen M, Lindenmayer AE, Chaubal A. Endothelial cell markers CD31, CD34, and  
871 BNH9 antibody to H- and Y-antigens--evaluation of their specificity and sensitivity in  
872 the diagnosis of vascular tumors and comparison with von Willebrand factor. *Mod*  
873 *Pathol.* 1994;7(1):82-90.
- 874 39. Huang J, Li X, Shi X, Zhu M, Wang J, Huang S, et al. Platelet integrin  $\alpha$ IIb $\beta$ 3:  
875 signal transduction, regulation, and its therapeutic targeting. *J Hematol Oncol.*  
876 2019;12(1):26.
- 877 40. Novotny WF, Palmier M, Wun TC, Broze GJ, Jr., Miletich JP. Purification and  
878 properties of heparin-releasable lipoprotein-associated coagulation inhibitor. *Blood.*  
879 1991;78(2):394-400.
- 880 41. Piro O, Broze GJ, Jr. Comparison of cell-surface TFPI $\alpha$  and  $\beta$ . *J Thromb*  
881 *Haemost.* 2005;3(12):2677-83.
- 882 42. Puhlmann M, Weinreich DM, Farma JM, Carroll NM, Turner EM, Alexander HR, Jr.  
883 Interleukin-1 $\beta$  induced vascular permeability is dependent on induction of  
884 endothelial tissue factor (TF) activity. *J Transl Med.* 2005;3:37.
- 885 43. Ji RC. Lymphatic endothelial cells, lymphedematous lymphangiogenesis, and  
886 molecular control of edema formation. *Lymphat Res Biol.* 2008;6(3-4):123-37.
- 887 44. Zhang F, Zarkada G, Yi S, Eichmann A. Lymphatic Endothelial Cell Junctions:  
888 Molecular Regulation in Physiology and Diseases. *Front Physiol.* 2020;11:509.
- 889 45. Foulon M, Robbe-Saule M, Manry J, Esnault L, Boucaud Y, Alcais A, et al.  
890 Mycolactone toxin induces an inflammatory response by targeting the IL-1 $\beta$   
891 pathway: Mechanistic insight into Buruli ulcer pathophysiology. *PLoS Pathog.*  
892 2020;16(12):e1009107.
- 893 46. Sohn RH, Deming CB, Johns DC, Champion HC, Bian C, Gardner K, et al.  
894 Regulation of endothelial thrombomodulin expression by inflammatory cytokines is  
895 mediated by activation of nuclear factor-kappa B. *Blood.* 2005;105(10):3910-7.
- 896 47. Antoniak S. The coagulation system in host defense. *Res Pract Thromb Haemost.*  
897 2018;2(3):549-57.
- 898 48. Cunningham MW. Pathogenesis of group A streptococcal infections. *Clin Microbiol*  
899 *Rev.* 2000;13(3):470-511.
- 900 49. McAdow M, Missiakas DM, Schneewind O. Staphylococcus aureus secretes  
901 coagulase and von Willebrand factor binding protein to modify the coagulation  
902 cascade and establish host infections. *J Innate Immun.* 2012;4(2):141-8.
- 903 50. Moxon CA, Wassmer SC, Milner DA, Jr., Chisala NV, Taylor TE, Seydel KB, et al.  
904 Loss of endothelial protein C receptors links coagulation and inflammation to parasite  
905 sequestration in cerebral malaria in African children. *Blood.* 2013;122(5):842-51.
- 906 51. Turner L, Lavstsen T, Berger SS, Wang CW, Petersen JE, Avril M, et al. Severe  
907 malaria is associated with parasite binding to endothelial protein C receptor. *Nature.*  
908 2013;498(7455):502-5.
- 909 52. diseases WDocont. Treatment of Mycobacterium ulcerans disease (Buruli Ulcer).  
910 2012:v, 66 p.
- 911 53. Zavattaro E, Boccafoschi F, Borgogna C, Conca A, Johnson RC, Sopoh GE, et al.  
912 Apoptosis in Buruli ulcer: a clinicopathological study of 45 cases. *Histopathology.*  
913 2012;61(2):224-36.
- 914 54. Bieri R, Scherr N, Ruf MT, Dangy JP, Gersbach P, Gehringer M, et al. The Macrolide  
915 Toxin Mycolactone Promotes Bim-Dependent Apoptosis in Buruli Ulcer through  
916 Inhibition of mTOR. *ACS Chem Biol.* 2017;12(5):1297-307.
- 917 55. Guenin-Mace L, Veyron-Churlet R, Thoulouze MI, Romet-Lemonne G, Hong H,  
918 Leadlay PF, et al. Mycolactone activation of Wiskott-Aldrich syndrome proteins  
919 underpins Buruli ulcer formation. *J Clin Invest.* 2013;123(4):1501-12.
- 920 56. Sarfo FS, Phillips R, Wansbrough-Jones M, Simmonds RE. Recent advances: role of  
921 mycolactone in the pathogenesis and monitoring of Mycobacterium ulcerans  
922 infection/Buruli ulcer disease. *Cell Microbiol.* 2016;18(1):17-29.

- 923 57. Rondaij MG, Bierings R, Kragt A, van Mourik JA, Voorberg J. Dynamics and plasticity  
924 of Weibel-Palade bodies in endothelial cells. *Arterioscler Thromb Vasc Biol*.  
925 2006;26(5):1002-7.
- 926 58. Valentijn KM, Sadler JE, Valentijn JA, Voorberg J, Eikenboom J. Functional  
927 architecture of Weibel-Palade bodies. *Blood*. 2011;117(19):5033-43.
- 928 59. Bauer AT, Suckau J, Frank K, Desch A, Goertz L, Wagner AH, et al. von Willebrand  
929 factor fibers promote cancer-associated platelet aggregation in malignant melanoma  
930 of mice and humans. *Blood*. 2015;125(20):3153-63.
- 931 60. Kalagara T, Moutsis T, Yang Y, Pappelbaum KI, Farken A, Cladder-Micus L, et al.  
932 The endothelial glycocalyx anchors von Willebrand factor fibers to the vascular  
933 endothelium. *Blood Adv*. 2018;2(18):2347-57.
- 934 61. Shattil SJ, Hoxie JA, Cunningham M, Brass LF. Changes in the platelet membrane  
935 glycoprotein IIb/IIIa complex during platelet activation. *J Biol Chem*.  
936 1985;260(20):11107-14.
- 937 62. McVey JH. The role of the tissue factor pathway in haemostasis and beyond. *Curr*  
938 *Opin Hematol*. 2016;23(5):453-61.
- 939 63. Mackman N. The role of tissue factor and factor VIIa in hemostasis. *Anesth Analg*.  
940 2009;108(5):1447-52.
- 941 64. Tatsumi K, Mackman N. Tissue Factor and Atherothrombosis. *J Atheroscler Thromb*.  
942 2015;22(6):543-9.
- 943 65. Kothari H, Keshava S, Vatsyayan R, Mackman N, Rao LV, Pendurthi UR. Role of  
944 tissue factor in Mycobacterium tuberculosis-induced inflammation and disease  
945 pathogenesis. *PLoS One*. 2014;9(12):e114141.
- 946 66. Kothari H, Rao LV, Vankayalapati R, Pendurthi UR. Mycobacterium tuberculosis  
947 infection and tissue factor expression in macrophages. *PLoS One*. 2012;7(9):e45700.
- 948 67. Venkatasubramanian S, Tripathi D, Tucker T, Paidipally P, Cheekatla S, Welch E, et  
949 al. Tissue factor expression by myeloid cells contributes to protective immune  
950 response against Mycobacterium tuberculosis infection. *Eur J Immunol*.  
951 2016;46(2):464-79.
- 952 68. Pawlinski R, Mackman N. Cellular sources of tissue factor in endotoxemia and  
953 sepsis. *Thromb Res*. 2010;125 Suppl 1:S70-3.
- 954 69. Ahamed J, Niessen F, Kurokawa T, Lee YK, Bhattacharjee G, Morrissey JH, et al.  
955 Regulation of macrophage procoagulant responses by the tissue factor cytoplasmic  
956 domain in endotoxemia. *Blood*. 2007;109(12):5251-9.
- 957 70. Luyendyk JP, Schabbauer GA, Tencati M, Holscher T, Pawlinski R, Mackman N.  
958 Genetic analysis of the role of the PI3K-Akt pathway in lipopolysaccharide-induced  
959 cytokine and tissue factor gene expression in monocytes/macrophages. *J Immunol*.  
960 2008;180(6):4218-26.
- 961 71. Owens AP, 3rd, Passam FH, Antoniak S, Marshall SM, McDaniel AL, Rudel L, et al.  
962 Monocyte tissue factor-dependent activation of coagulation in hypercholesterolemic  
963 mice and monkeys is inhibited by simvastatin. *J Clin Invest*. 2012;122(2):558-68.
- 964 72. Chakravorty D, Kato Y, Koide N, Sugiyama T, Kawai M, Fukada M, et al. Production  
965 of tissue factor in CD14-expressing human umbilical vein endothelial cells by  
966 lipopolysaccharide. *FEMS Microbiol Lett*. 1999;178(2):235-9.
- 967 73. Colucci M, Balconi G, Lorenzet R, Pietra A, Locati D, Donati MB, et al. Cultured  
968 human endothelial cells generate tissue factor in response to endotoxin. *J Clin*  
969 *Invest*. 1983;71(6):1893-6.
- 970 74. Pawlinski R, Mackman N. Use of mouse models to study the role of tissue factor in  
971 tumor biology. *Semin Thromb Hemost*. 2008;34(2):182-6.
- 972 75. Nomura S, Shimizu M. Clinical significance of procoagulant microparticles. *J*  
973 *Intensive Care*. 2015;3(1):2.
- 974 76. Moosbauer C, Morgenstern E, Cuvelier SL, Manukyan D, Bidzhekov K, Albrecht S, et  
975 al. Eosinophils are a major intravascular location for tissue factor storage and  
976 exposure. *Blood*. 2007;109(3):995-1002.

- 977 77. Lipets EN, Antonova OA, Shustova ON, Losenkova KV, Mazurov AV, Ataullakhanov  
978 FI. Use of Thrombodynamics for revealing the participation of platelet, erythrocyte,  
979 endothelial, and monocyte microparticles in coagulation activation and propagation.  
980 PLoS One. 2020;15(5):e0227932.
- 981 78. Zwicker JI, Liebman HA, Neuberg D, Lacroix R, Bauer KA, Furie BC, et al. Tumor-  
982 derived tissue factor-bearing microparticles are associated with venous  
983 thromboembolic events in malignancy. Clin Cancer Res. 2009;15(22):6830-40.
- 984 79. Mendoza CE, Brant EJ, McDermott ML, Froment A, Hu Y, Hogan SL, et al. Elevated  
985 Microparticle Tissue Factor Activity Differentiates Patients With Venous  
986 Thromboembolism in Anti-neutrophil Cytoplasmic Autoantibody Vasculitis. Kidney Int  
987 Rep. 2019;4(11):1617-29.
- 988 80. Nieuwland R, Berckmans RJ, Rotteveel-Eijkman RC, Maquelin KN, Roozendaal KJ,  
989 Jansen PG, et al. Cell-derived microparticles generated in patients during  
990 cardiopulmonary bypass are highly procoagulant. Circulation. 1997;96(10):3534-41.
- 991 81. Khan E, Ambrose NL, Ahnstrom J, Kiprianos AP, Stanford MR, Eleftheriou D, et al. A  
992 low balance between microparticles expressing tissue factor pathway inhibitor and  
993 tissue factor is associated with thrombosis in Behcet's Syndrome. Sci Rep.  
994 2016;6:38104.
- 995 82. Aras O, Shet A, Bach RR, Hysjulien JL, Slungaard A, Hebbel RP, et al. Induction of  
996 microparticle- and cell-associated intravascular tissue factor in human endotoxemia.  
997 Blood. 2004;103(12):4545-53.
- 998 83. Cugno M, Marzano AV, Tedeschi A, Fanoni D, Venegoni L, Asero R. Expression of  
999 tissue factor by eosinophils in patients with chronic urticaria. Int Arch Allergy  
1000 Immunol. 2009;148(2):170-4.
- 1001 84. Torrado E, Fraga AG, Castro AG, Stragier P, Meyers WM, Portaels F, et al. Evidence  
1002 for an intramacrophage growth phase of Mycobacterium ulcerans. Infect Immun.  
1003 2007;75(2):977-87.
- 1004 85. Privratsky JR, Newman PJ. PECAM-1: regulator of endothelial junctional integrity.  
1005 Cell Tissue Res. 2014;355(3):607-19.
- 1006 86. Kawamoto E, Okamoto T, Takagi Y, Honda G, Suzuki K, Imai H, et al. LFA-1 and  
1007 Mac-1 integrins bind to the serine/threonine-rich domain of thrombomodulin. Biochem  
1008 Biophys Res Commun. 2016;473(4):1005-12.
- 1009 87. Pai VC, Lo IC, Huang YW, Tsai IC, Cheng HP, Shi GY, et al. The chondroitin sulfate  
1010 moiety mediates thrombomodulin-enhanced adhesion and migration of vascular  
1011 smooth muscle cells. J Biomed Sci. 2018;25(1):14.
- 1012 88. Fahey E, Doyle SL. IL-1 Family Cytokine Regulation of Vascular Permeability and  
1013 Angiogenesis. Front Immunol. 2019;10:1426.
- 1014 89. Oehlers SH, Cronan MR, Beerman RW, Johnson MG, Huang J, Kontos CD, et al.  
1015 Infection-Induced Vascular Permeability Aids Mycobacterial Growth. J Infect Dis.  
1016 2017;215(5):813-7.
- 1017 90. Gaertner F, Massberg S. Patrolling the vascular borders: platelets in immunity to  
1018 infection and cancer. Nat Rev Immunol. 2019;19(12):747-60.
- 1019 91. Cromer WE, Zawieja SD, Tharakan B, Childs EW, Newell MK, Zawieja DC. The  
1020 effects of inflammatory cytokines on lymphatic endothelial barrier function.  
1021 Angiogenesis. 2014;17(2):395-406.
- 1022 92. Capela C, Sopoh GE, Houezo JG, Fiodessihoue R, Dossou AD, Costa P, et al.  
1023 Clinical Epidemiology of Buruli Ulcer from Benin (2005-2013): Effect of Time-Delay to  
1024 Diagnosis on Clinical Forms and Severe Phenotypes. PLoS Negl Trop Dis.  
1025 2015;9(9):e0004005.
- 1026 93. Li J, Chen J, Kirsner R. Pathophysiology of acute wound healing. Clin Dermatol.  
1027 2007;25(1):9-18.
- 1028 94. Kanga JM, Dion-Laine M, Kacou DE, Menan EI. [Contribution of heparin therapy in  
1029 the medical treatment of Buruli ulcer apropos of 1 case]. Bull Soc Pathol Exot.  
1030 2001;94(1):32-5.

- 1031 95. Vogel M, Bayi PF, Ruf MT, Bratschi MW, Bolz M, Um Boock A, et al. Local Heat  
1032 Application for the Treatment of Buruli Ulcer: Results of a Phase II Open Label Single  
1033 Center Non Comparative Clinical Trial. *Clin Infect Dis*. 2016;62(3):342-50.
- 1034 96. Hui KY, Haber E, Matsueda GR. Monoclonal antibodies to a synthetic fibrin-like  
1035 peptide bind to human fibrin but not fibrinogen. *Science*. 1983;222(4628):1129-32.
- 1036 97. Kurata R, Futaki S, Nakano I, Fujita F, Tanemura A, Murota H, et al. Three-  
1037 dimensional cell shapes and arrangements in human sweat glands as revealed by  
1038 whole-mount immunostaining. *PLoS One*. 2017;12(6):e0178709.
- 1039 98. Pusztaszeri MP, Seelentag W, Bosman FT. Immunohistochemical expression of  
1040 endothelial markers CD31, CD34, von Willebrand factor, and Fli-1 in normal human  
1041 tissues. *J Histochem Cytochem*. 2006;54(4):385-95.
- 1042 99. Song F, Fidanze S, Benowitz AB, Kishi Y. Total synthesis of the mycolactones. *Org*  
1043 *Lett*. 2002;4(4):647-50.

1044 **M. ulcerans confirmed (n = 8)**

|                       |                   |                  |
|-----------------------|-------------------|------------------|
| <b>Age (years)</b>    |                   | <b>12 (7-70)</b> |
| <b>Type of lesion</b> | Ulcerative        | 6 (75%)          |
|                       | Plaque            | 2 (25%)          |
| <b>WHO category</b>   | 1                 | 2 (25%)          |
|                       | 2                 | 4 (50%)          |
|                       | 3                 | 2 (25%)          |
| <b>Location</b>       | Upper extremities | 4 (50%)          |
|                       | Lower extremities | 4 (50%)          |

1045

1046 **Table 1. Clinical features of analysed Burui ulcer patients.** Category 1: a single lesion <  
1047 5 cm in diameter; Category 2: a single lesion 5-15 cm in diameter; Category 3: a single  
1048 lesion > 15 cm in diameter, multiple small lesions or facial lesions. Age is presented in  
1049 median (with range) and the rest of data are n (%).

1050

1051 **Figure Legends**

1052

1053 **Fig 1. Thrombomodulin expression and fibrin deposition in and around analysed**  
1054 **vessels. A.** Vessels in pre-defined areas of punch biopsy samples lacking submacroscopic  
1055 appearance of coagulative necrosis (see methods) of 8 BU patients (6 with ulcerated lesions  
1056 and 2 with plaque lesions) were tracked by the endothelial cell marker CD31 and perivascular  
1057 cell marker SMA, analysed and categorised according to the expression of TM, CD31 and  
1058 SMA. The number of vessels in each category per patient was expressed as a percentage of  
1059 the total number of the vessels counted for that representative area (listed right). Patients  
1060 displaying plaque lesions are indicated with asterisks. The pie chart to the right shows the  
1061 overall distribution of each category. **B and C.** The degree of fibrin deposition surrounding  
1062 tracked vessels in A. **B** represents the distribution of fibrin scores of thrombomodulin-positive  
1063 (TM<sup>+</sup>) and thrombomodulin-negative (TM<sup>-</sup>) vessels. Increasing fibrin scores corresponding to  
1064 increasing extension of fibrin staining and are represented by stronger colour (0; no fibrin  
1065 staining with 20 µm, 1-3 are fibrin staining in a <20, 20-30 and >30 µm radius, respectively).  
1066 The total number of the vessels analysed is shown. **C.** The intensity of fibrin staining within a  
1067 20 µm area around each analysed vessel (TM<sup>-</sup> or TM<sup>+</sup>) was quantified and expressed as  
1068 percentage of the total analysed area for all and fibrin positive (Fib<sup>+</sup>) vessels. Data for  
1069 individual vessels as well as median and interquartile range is shown. \*\*\*; *P* < 0.001.

1070

1071 **Fig 2. Endothelial von Willebrand factor is downregulated in response to mycolactone**  
1072 **and redistributes in BU lesions. A-E.** Histological sections stained with antibodies against  
1073 vWF (A1-2, B1-3, C6, D6 and E6), platelet glycoprotein CD61 (B4, C5, D5 and E5), SMA (C1,  
1074 D1 and E1), CD31 (C2, D2 and E2), TM (C3, D3 and E3) and fibrin (C4, D4 and E4) (positive  
1075 staining in brown colour) and counterstained with haematoxylin in a healthy subject (A1-2) and  
1076 BU patients (B, C, D and E). Scale bars as indicated. **A-B.** Examples of vessels with different  
1077 phenotypes for vWF expression are indicated as follows; black arrows for normal expression,  
1078 black arrowheads for reduced expression and black stars for vessels displaying intravascular  
1079 vWF staining. Outlined regions in B4 showing distinct CD61 expression patterns in defined  
1080 (the upper two; crop panels see C5 & D5) and in necrotic region (the bottom one; crop panel  
1081 see E5). **C-D.** Examples of vessels with different phenotypes in pre-defined areas of BU punch  
1082 biopsy samples lacking submacroscopic appearance of coagulative necrosis (see methods)  
1083 are indicated as follows; purple arrows are SMA<sup>+</sup>CD31<sup>-</sup>TM<sup>-</sup>, blue arrows are SMA<sup>+</sup>CD31<sup>+</sup>TM<sup>-</sup>,  
1084 and asterisks are SMA<sup>+</sup>CD31<sup>+</sup>TM<sup>+</sup> vessels. **E.** An example of a CD61<sup>+</sup> vessel displaying fibrin  
1085 deposition in the necrotic subcutis is indicated with a red arrow. **F.** The overall distribution of

1086 vWF staining patterns in all patients (top panel) and vessels in immune cell-infiltrated regions  
1087 (lower panel). The distribution of fibrin scores per vWF staining pattern (i.e. normal,  
1088 intravascular and vWF-) is represented by pie charts with the total analysed vessel number  
1089 shown. Increasing fibrin scores corresponding to increasing extension of fibrin staining are  
1090 represented by darker colour (0; no fibrin staining with 20  $\mu$ m, 1-3 are fibrin staining in a <20,  
1091 20-30 and >30  $\mu$ m radius, respectively). **G & H.** Primary endothelial cells were treated with  
1092 10 ng/mL of mycolactone (MYC), 0.02% DMSO or untreated (Ctrl) for 24 hours. **G.** HUVECs  
1093 were fixed, permeabilised and immunostained with anti-vWF antibody. vWF-containing  
1094 granules are shown in green and nuclei stained with DAPI (blue). Scale bar = 50  $\mu$ m. Scatter  
1095 plot showing vWF-positive granules per cell in each condition. \*\*\*\*;  $P < 0.0001$ . **H.** HDMECs  
1096 were treated with 2 U/mL thrombin to induce exocytosis of Weibel-Palade bodies. The  
1097 concentration of vWF in supernatants was quantified by ELISA. nd, not detected.

1098

1099 **Fig 3. Tissue factor expression is altered in BU patient skin lesion. A-G.** Histological  
1100 sections were stained with anti-tissue factor (TF) antibody (A1-2, B5, C5, D5, E5, F5 and G5),  
1101 anti-SMA antibody (B1, C1, D1, E1, F1 and G1), anti-CD31 antibody (B2, C2, D2, E2, F2 and  
1102 G2), eosin (B3, C3, D3, E3, F3 and G3) or anti-fibrin antibody (B4, C4, D4, E4, F4 and G4)  
1103 (positive staining in a brown colour) and counterstained with haematoxylin in healthy subjects  
1104 (A) or in pre-defined areas of BU punch biopsy samples lacking submacroscopic appearance  
1105 of coagulative necrosis (see methods) (B-G). Scale bar = 50  $\mu$ m (20  $\mu$ m in the crop panels of  
1106 D5, E5 and F5). **B & C.** Red arrows indicate regions of TF staining distant from the vessel  
1107 basement membrane (BM). **D.** Asterisks label the same vessel, black arrows in the crop panel  
1108 of D5 indicate examples of cells containing punctate structures staining strongly for TF. **E.**  
1109 Black arrows indicate examples of cells staining intensively for TF throughout the cells, in  
1110 regions where cells stained intensively for eosin in the H&E stain (black arrowhead). **F.** An  
1111 orange arrow in the crop panel of F5 indicates an example of the endothelium of a small vessel  
1112 stained positively for TF. **G.** Purple arrows indicate examples in a region where multiple small  
1113 vessels contained unidentified structures stained positively for TF. **H.** The overall distribution  
1114 of vessel phenotypes for TF staining across 8 BU patients. The distribution of fibrin scores  
1115 associated with each phenotype are represented as pie charts. Increasing fibrin scores  
1116 corresponding to increasing extension of fibrin staining are represented by stronger colour (0;  
1117 no fibrin staining with 20  $\mu$ m, 1-3 are fibrin staining in a <20, 20-30 and >30  $\mu$ m radius,  
1118 respectively). The total number of the vessels analysed is shown.

1119



1120 **Fig 4. Mycolactone reduces the expression of tissue factor pathway inhibitor in**  
1121 **endothelial cells. A.** HDMECs exposed to 10 ng/mL of mycolactone (MYC) for the indicated  
1122 times, 0.02% DMSO or untreated (Ctrl) were lysed and subjected to immunoblotting. TFPI  
1123 immunoblot intensity was normalised according to GAPDH and untreated controls. Data from  
1124 3 independent experiments are presented (mean  $\pm$  SEM). **B.** Supernatant was collected from  
1125 cells treated as above for 24 hours, cell debris removed and TFPI was quantified by ELISA.  
1126 Values represent the mean of three independent experiments  $\pm$  SEM. \*\*\*,  $P < 0.001$ ; \*\*\*\*,  $P <$   
1127 0.0001.

1128

1129 **Fig 5. Extravascular tissue factor (TF) is the primary driver of fibrin deposition in BU**  
1130 **lesions, potentially driven by an increase in vascular permeability. A & B.** Correlation  
1131 between the abundance of fibrin within a 20  $\mu$ m radius of each vessel and the abundance of  
1132 tissue factor (TF) in the same radius (**A**) or the distance the TF<sup>+</sup> signal extended from the  
1133 vessel basement membrane (BM) (**B**) for 45 trackable vessels.  $r$  is Spearman's rank  
1134 correlation coefficient for each data set. **C & D.** Permeability of HDMEC (**C**) or HDLEC (**D**)  
1135 monolayers, on inserts with 0.4 and 1  $\mu$ m pores respectively, that remained untreated (Ctrl),  
1136 or were exposed to 0.02% DMSO, 2.5 or 10 ng/mL mycolactone (MYC), or 100 ng/mL IL-1 $\beta$   
1137 for 24 hrs. Fluorescence intensity of FITC-dextran in the receiver wells was measured and  
1138 presented as a % where 100% is the value obtained from transwell lacking a cell monolayer,  
1139 and 0% is untreated control wells. Values represent the mean of three independent  
1140 experiments  $\pm$  SEM. \*\*,  $P < 0.01$ ; \*\*\*\*,  $P < 0.0001$ .

1141

1142 **Fig 6. IL-1 $\beta$  aggravates mycolactone-driven endothelial dysfunction.** HDMECs (**A**) or  
1143 HDLECs (**B**) were exposed to different concentrations of mycolactone (MYC), and/or IL-1 $\beta$  for  
1144 24 hours, then lysed and subjected to immunoblotting. TM immunoblot intensity was  
1145 normalised according to GAPDH and expressed relative to untreated controls. Mean  
1146 expression level from 3 independent experiments are presented as a heatmap where  
1147 increased TM loss is represented by a paler colour. **C.** Permeability of HDMEC monolayers  
1148 on inserts with 1  $\mu$ m pores was quantified after exposure to mycolactone (MYC) and/or IL-1 $\beta$   
1149 for 24 hours. Fluorescence intensity of FITC-dextran in the receiver wells was measured and  
1150 presented as a % where 100% is the value obtained from transwell lacking a cell monolayer,  
1151 and 0% is untreated control wells. Values represent the mean of five independent experiments  
1152  $\pm$  SEM. \*,  $P < 0.05$ ; \*\*,  $P < 0.01$ ; \*\*\*\*,  $P < 0.0001$ .

1153

1154

1155 **Supporting information Captions**

1156

1157 **S1 Fig. The expression patterns of haemostatic modulators in 8 BU patient skin**  
1158 **biopsies.** Histological sections from 8 BU patient punch biopsies stained with eosin (H&E) or  
1159 antibody against fibrin, TM, CD61, CD31, SMA, TF and vWF and counterstained with  
1160 Haematoxylin. The defined regions identified by a pathologist are outlined in red; vessels in  
1161 these areas were tracked and analysed for this study. Immune cell infiltration regions  
1162 containing vWF seen in micro vessel lumen outlined in blue. Scale bar = 1 mm.

1163

1164 **S2 Fig. General features of BU patient skin biopsies. A.** Comparison of the staining  
1165 patterns with the same anti-SMA or anti-fibrin antibody and conditions seen for the same  
1166 punch biopsies at different positions in the tissue block. The “initial section” displays those  
1167 performed for Ogbechi et al., 2015 [28], whereas the “serial section” was performed for the  
1168 present work. Arrows in different colours label the same vessel identified in different tissue  
1169 sections. Scale bar = 500  $\mu$ m. Note how the vessel phenotype can vary even over small  
1170 distances. **B.** An example of vessel identification and labelling (in colours with individual  
1171 number indicated) in serial tissue sections stained with anti-SMA and CD31 antibody. **C.**  
1172 Mycobacterial clusters (in purple, indicated with arrows) are identified in histological sections  
1173 from 2 BU patient punch biopsies with Ziehl-Neelsen staining. Scar bars as indicated.

1174

1175 **S3 Fig. vWF expression in BU patient specimen and in primary HDMECs. A.** Histological  
1176 sections of a healthy subject or BU patient stained with anti-vWF antibody, the respective  
1177 isotype control or secondary antibody alone and counterstained with Haematoxylin. **B.**  
1178 HDMECs were treated with 10 ng/mL of mycolactone (MYC), 0.02% DMSO or untreated (Ctrl)  
1179 for 24 hours. Cells were fixed, permeabilised and immunostained with anti-vWF antibody.  
1180 vWF-containing granules are shown in green and nuclei stained with DAPI (blue). Scale bar =  
1181 20  $\mu$ m.

1182

1183 **S4 Fig. Tissue factor (TF) expression patterns in BU patient specimen. A.** Histological  
1184 sections of a healthy subject or BU patient stained with anti-TF antibody, the respective isotype  
1185 control or secondary antibody alone and counterstained with Haematoxylin. **B & C.**  
1186 Histological sections stained with Haematoxylin and eosin or antibodies against TF and fibrin  
1187 and counterstained with Haematoxylin in BU patients. TF-positive activated leukocytes in

1188 necrotic subcutis (**B**) and structures at the edge of the haemorrhagic area (**C**). Scale bar as  
1189 indicated.

1190

1191 **S5 Fig. Susceptibility of endothelial cells to mycolactone.** Cell viability of HDLECs,  
1192 HDMECs and HUVECs exposed to a variety doses of mycolactone for 5 days was determined  
1193 using alamarBlue assay and presented as a % where 100% is the value obtained from cells  
1194 treated with solvent control DMSO.

**A**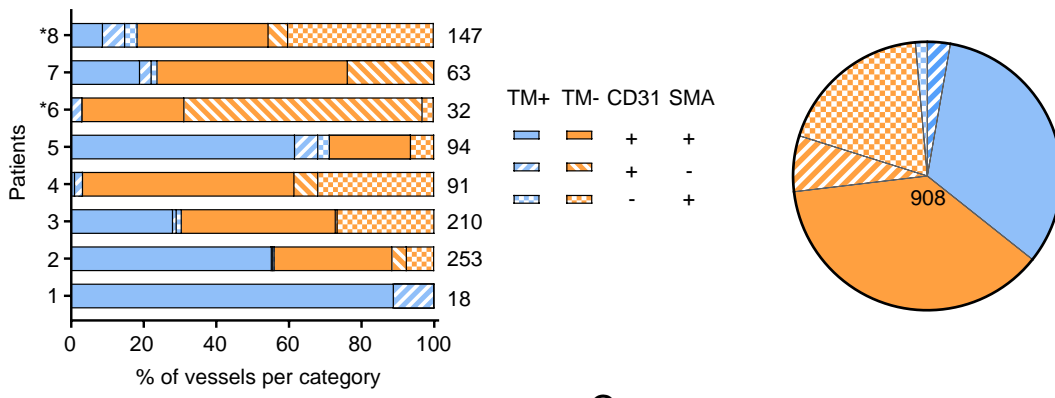**B**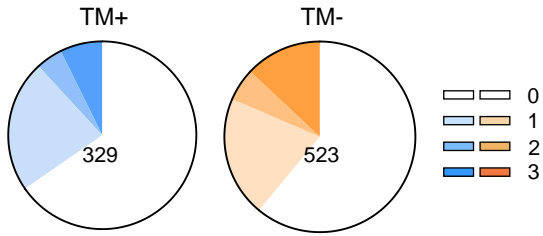**C**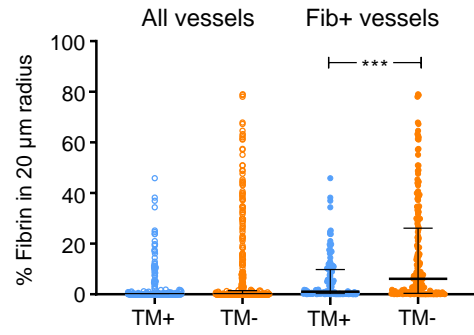**Fig 1**

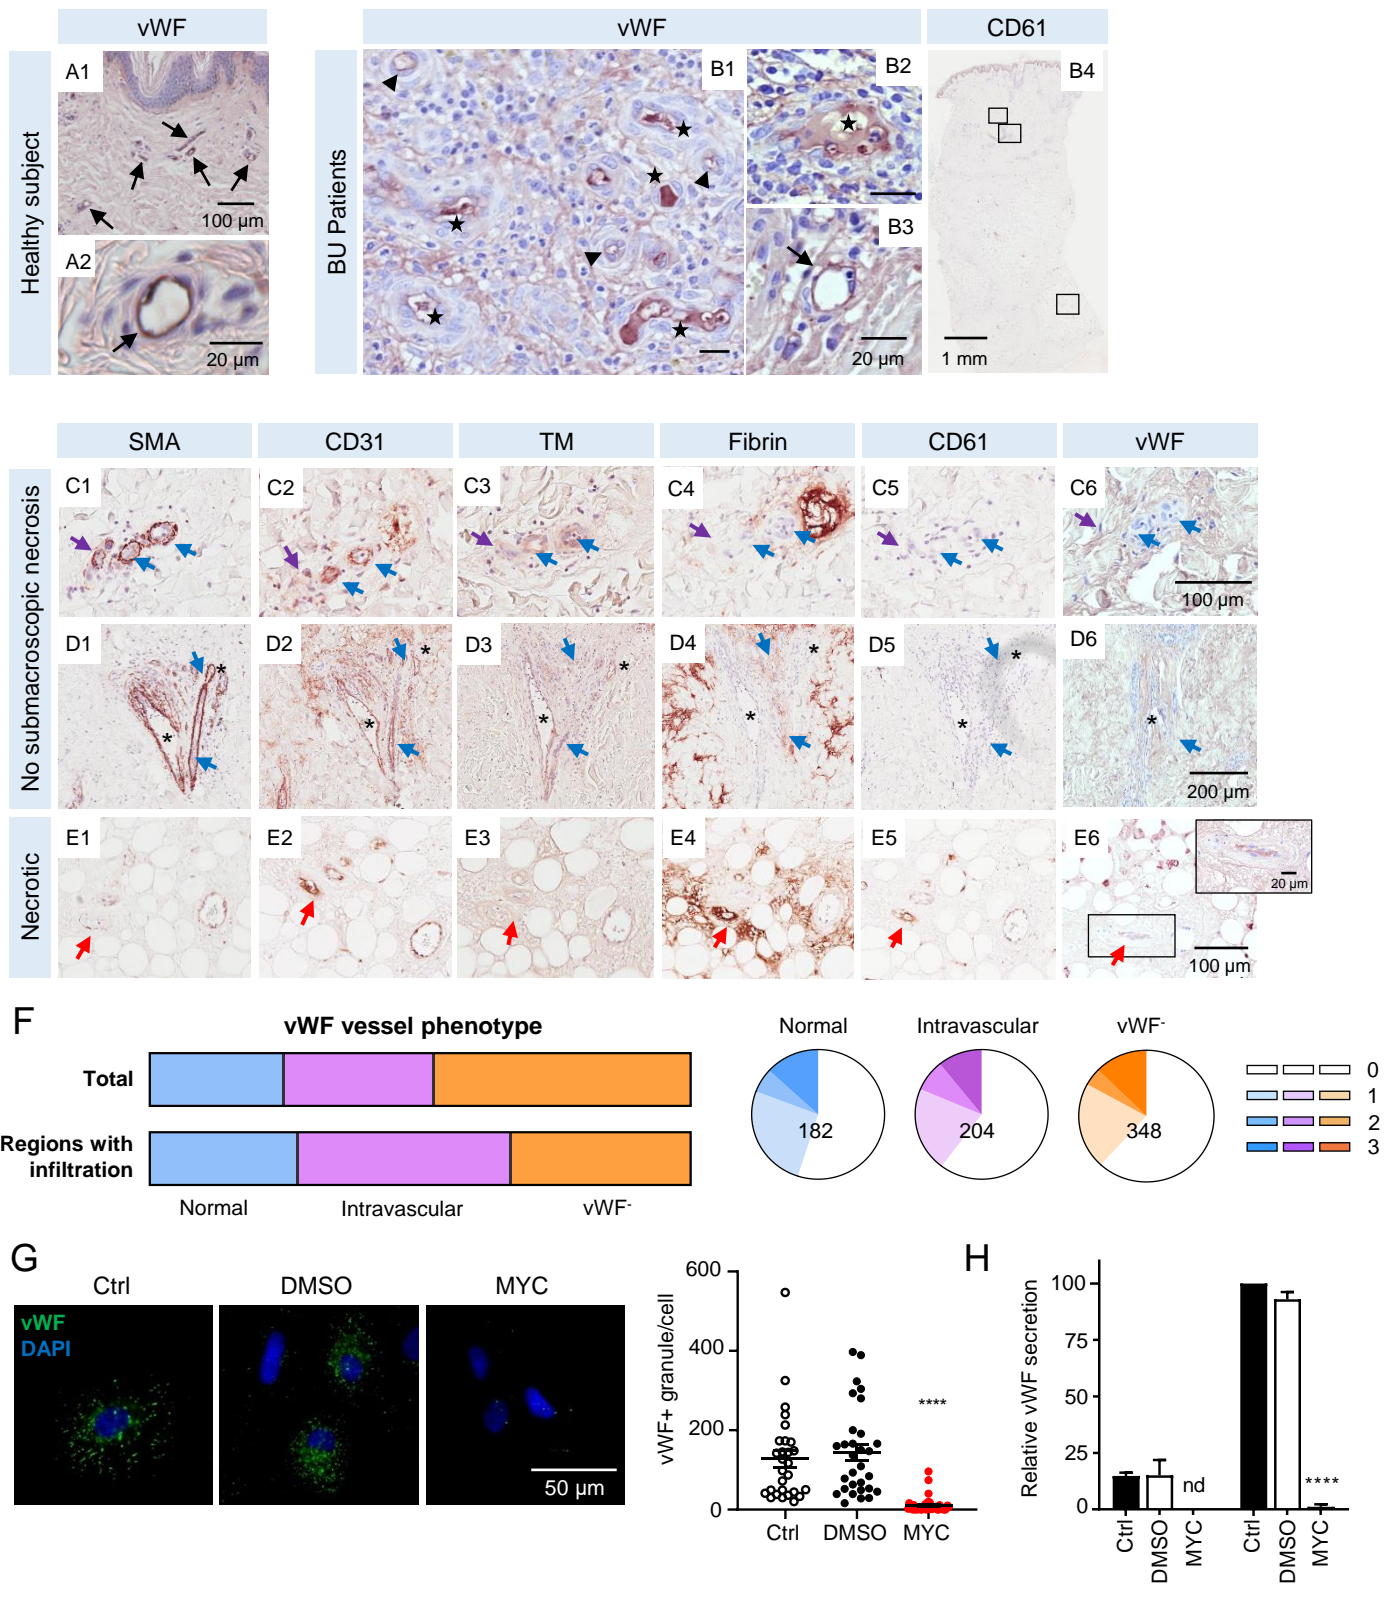

Fig 2

Healthy subjects

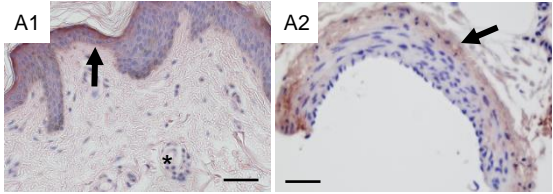

SMA

CD31

H&E

Fibrin

TF

BU patients: No submacroscopic necrosis

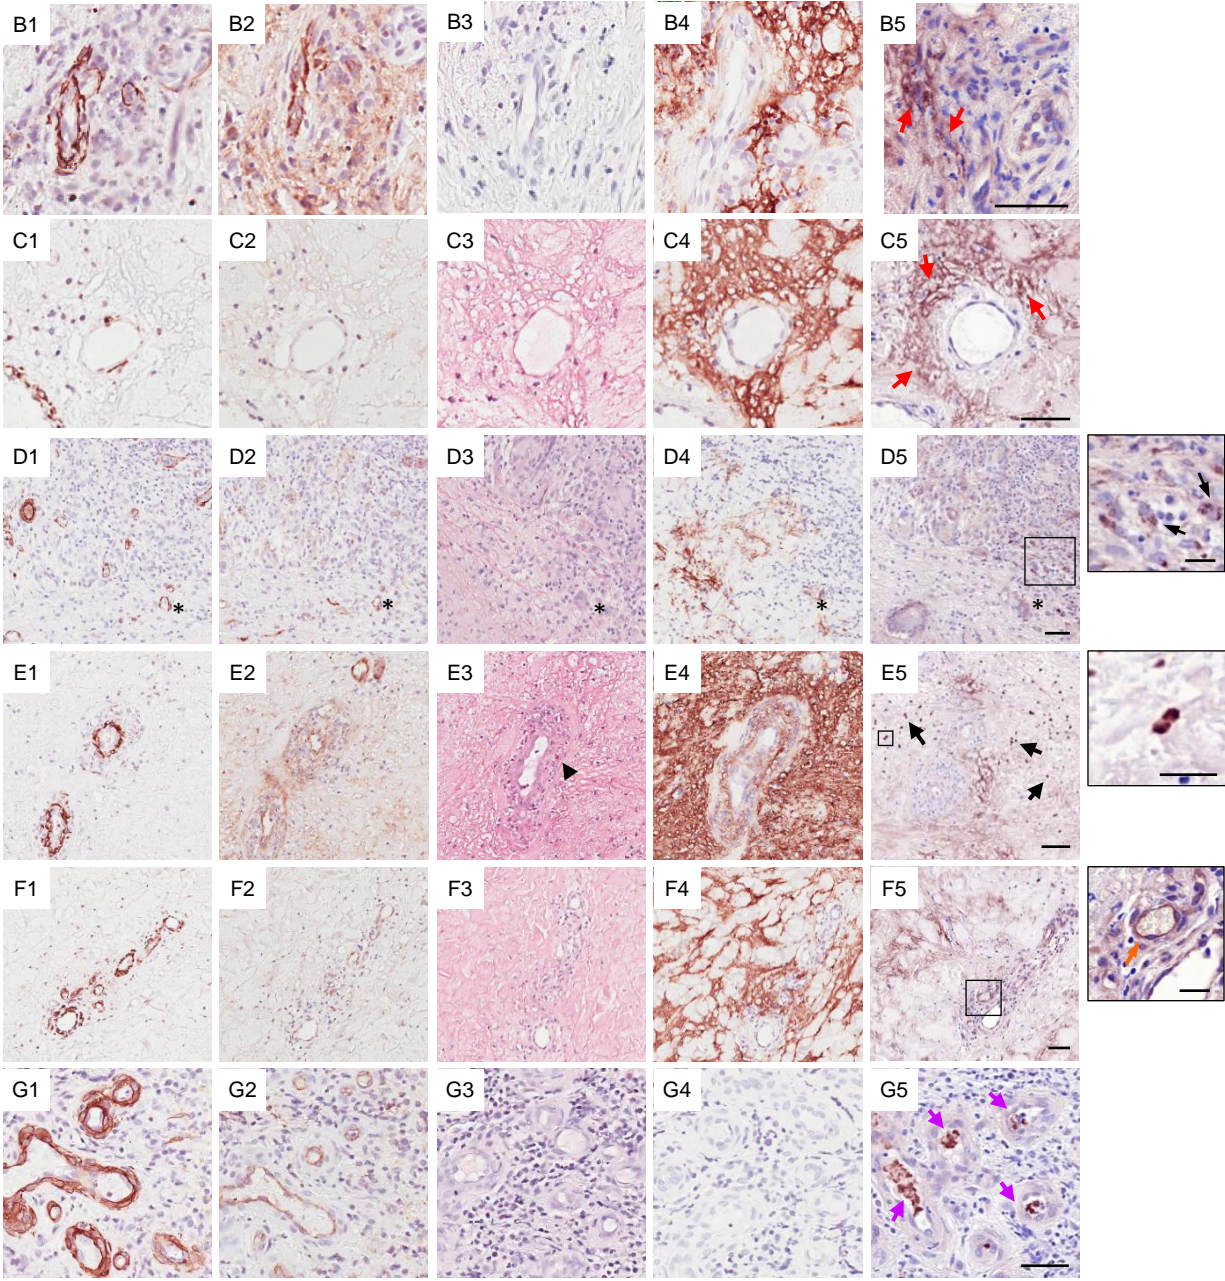

H

Tissue Factor vessel phenotype

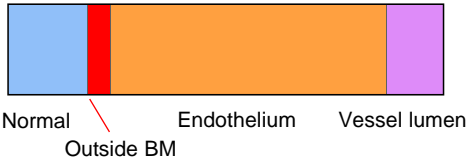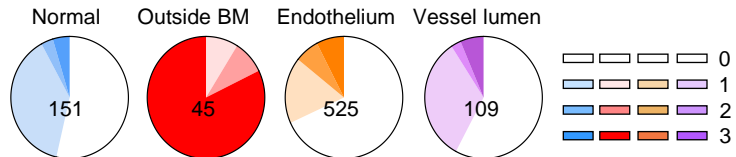

Fig 3

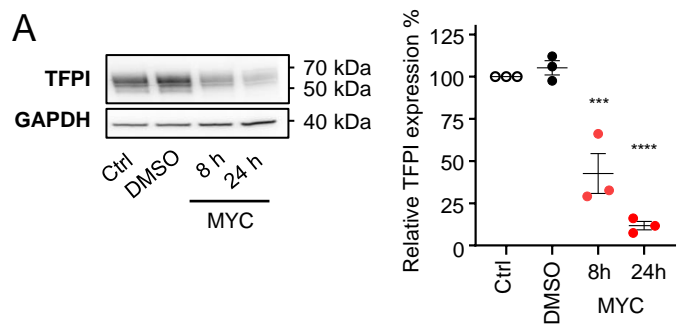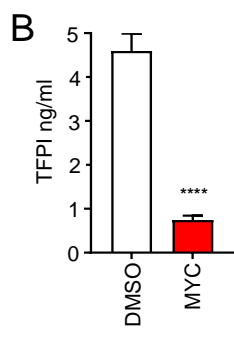

Fig 4

**A**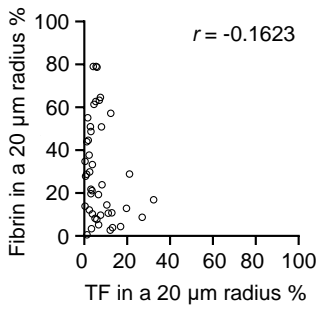**B**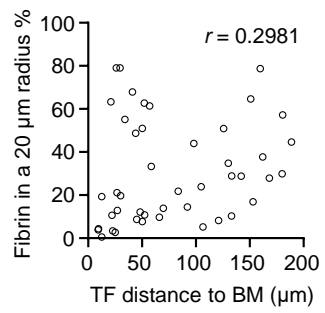**C**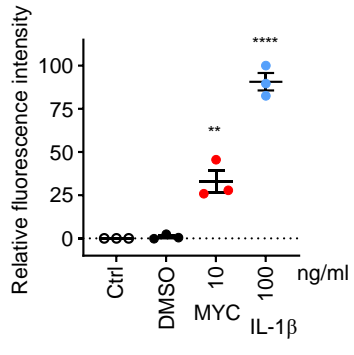**D**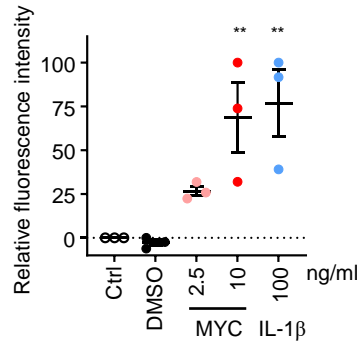



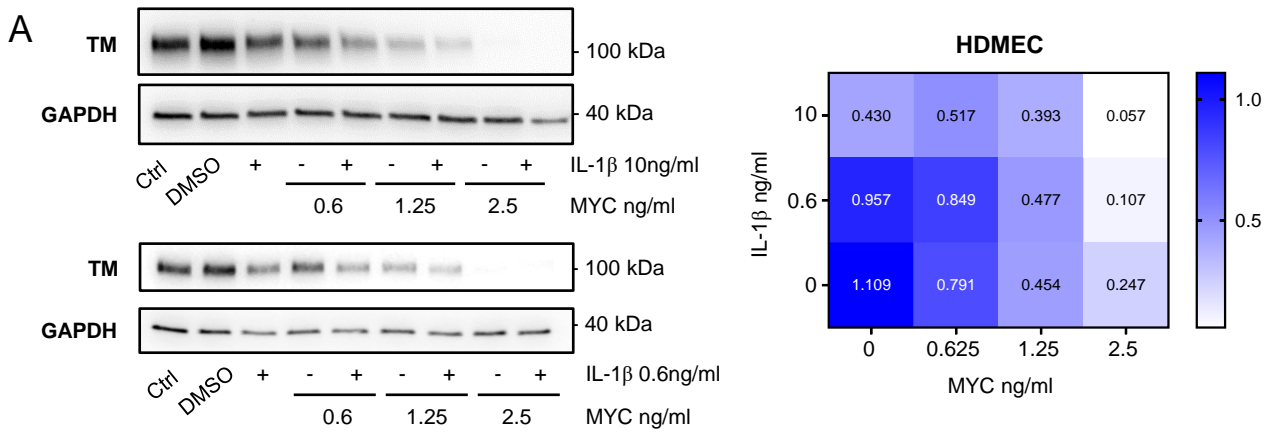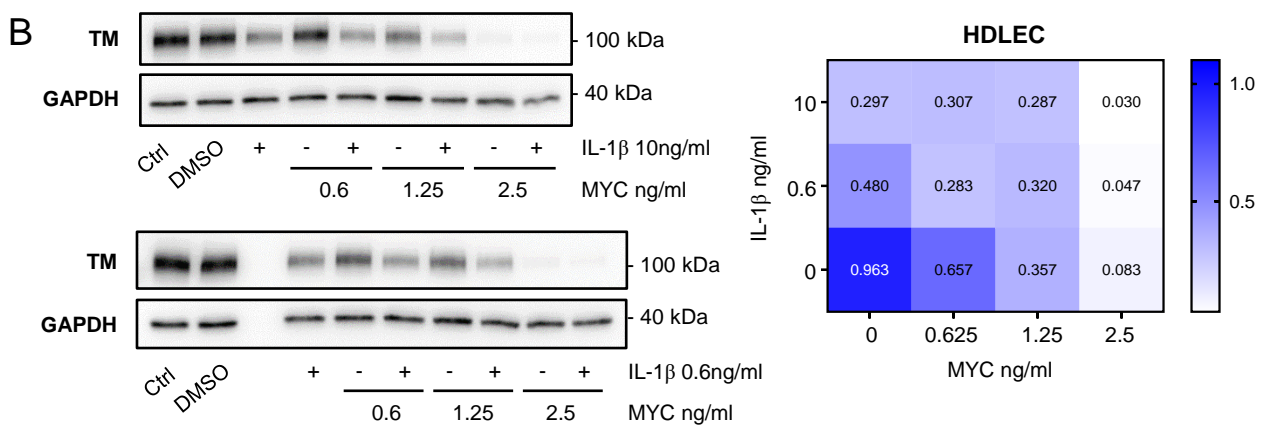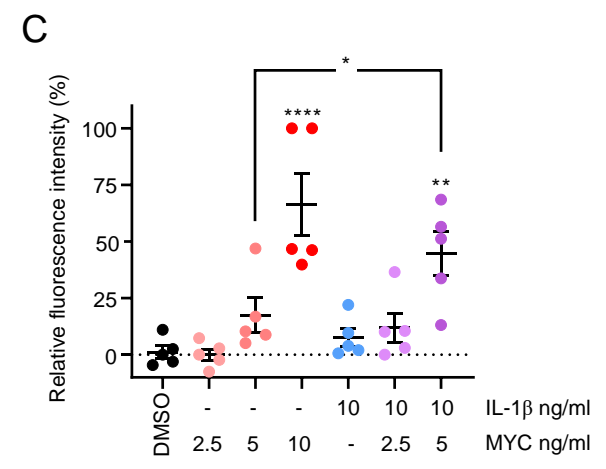

Fig 6

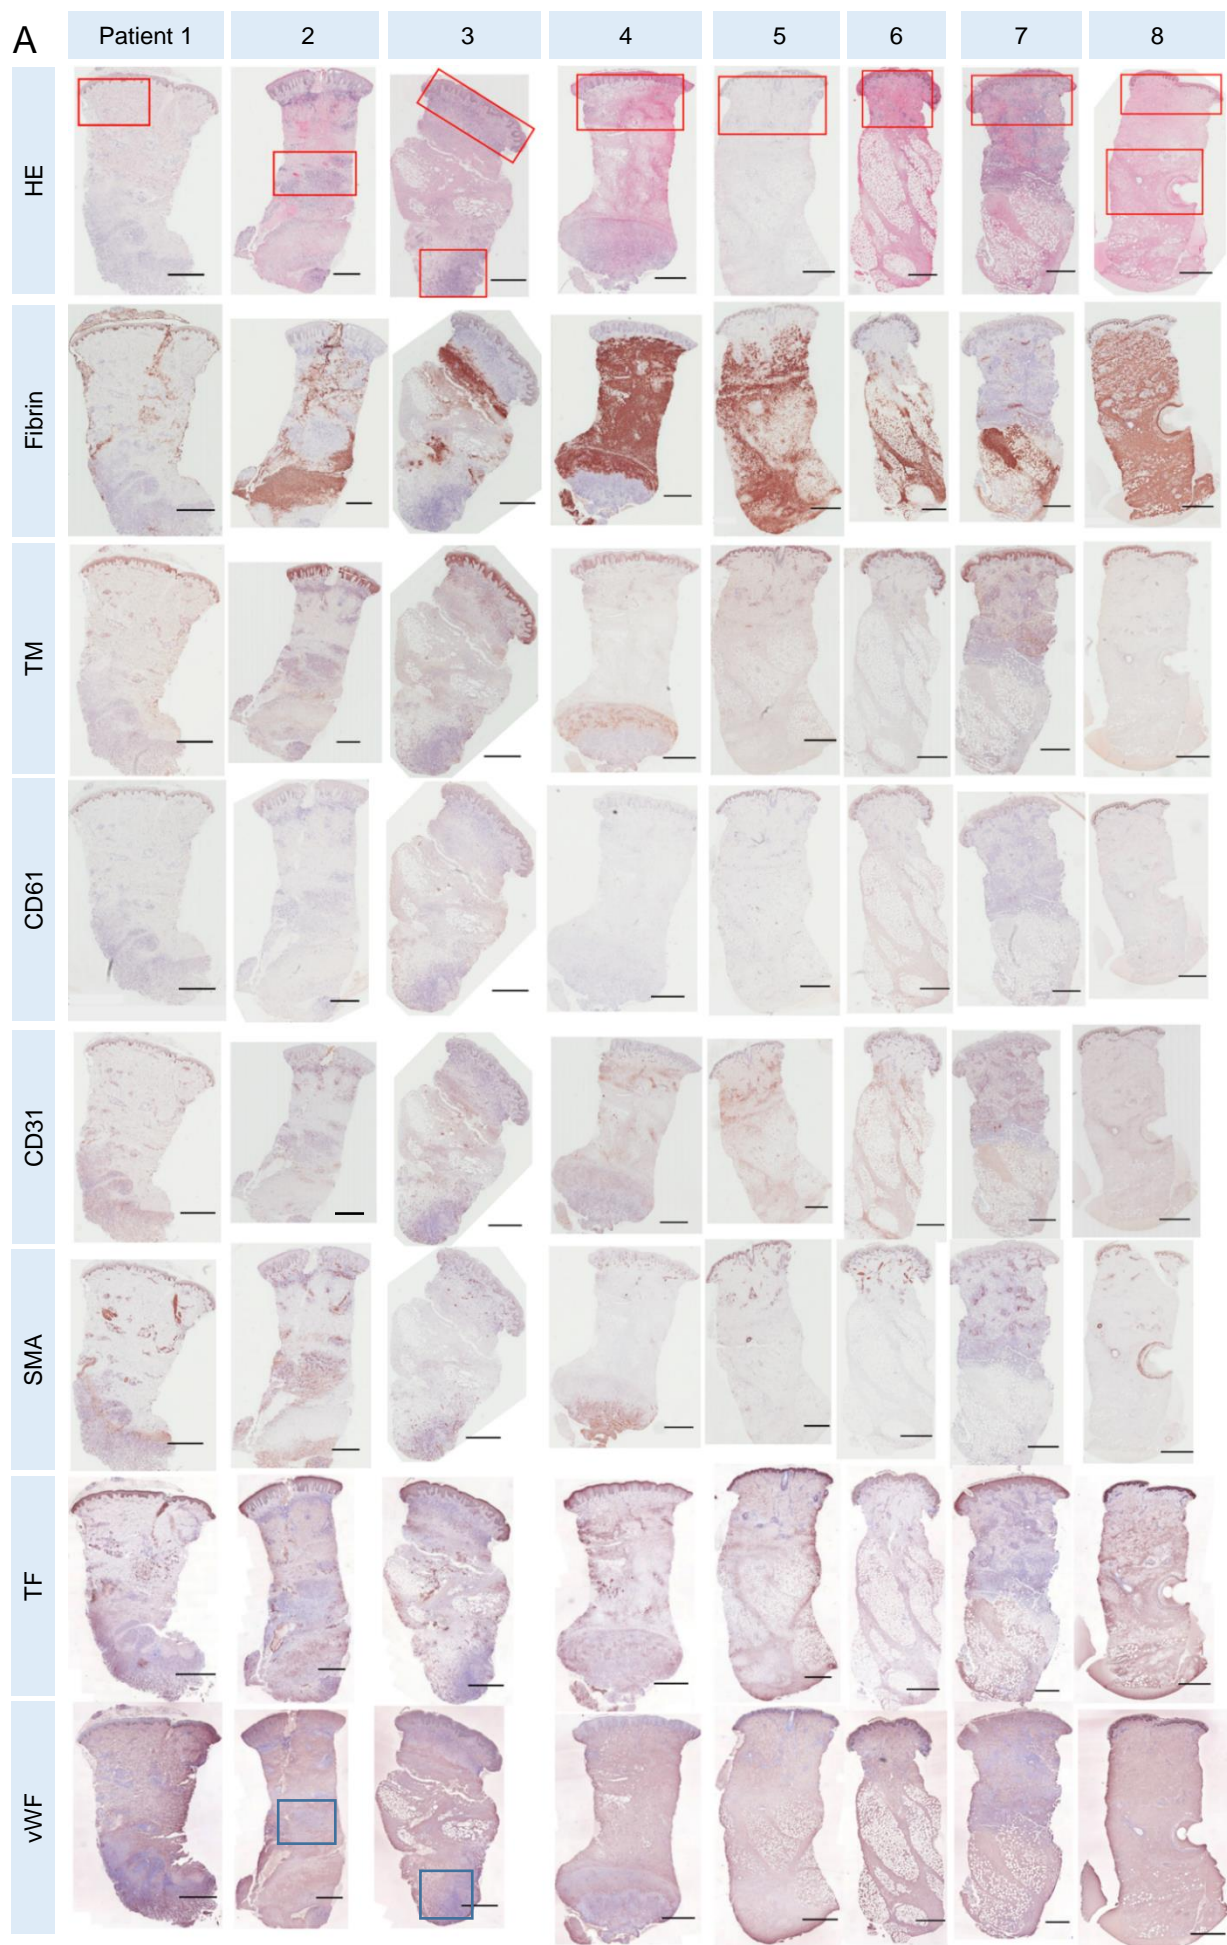

Fig S1

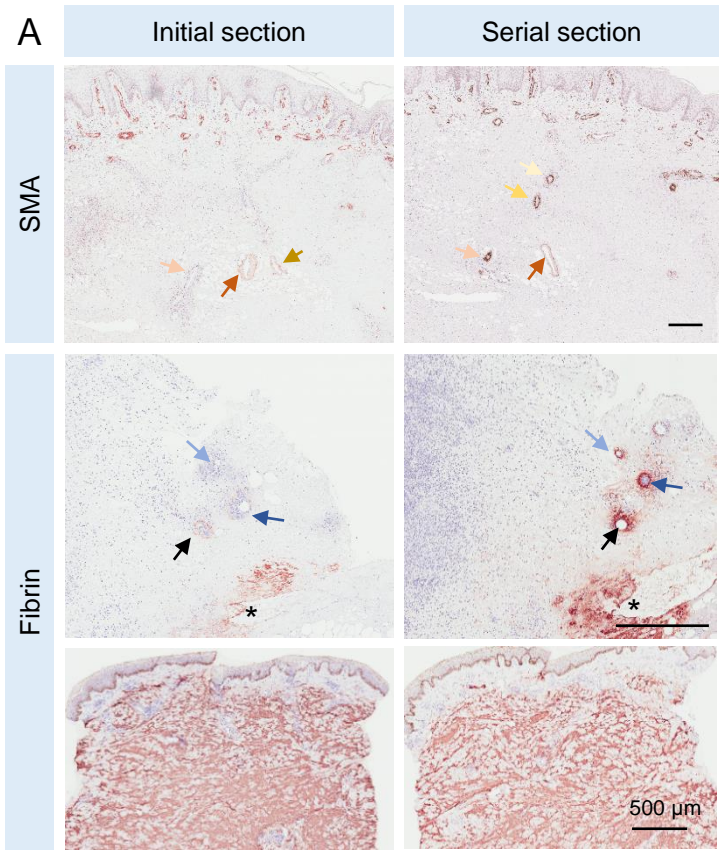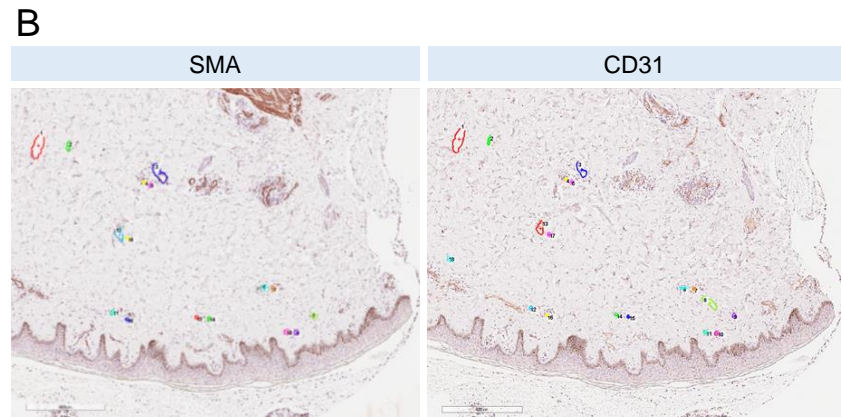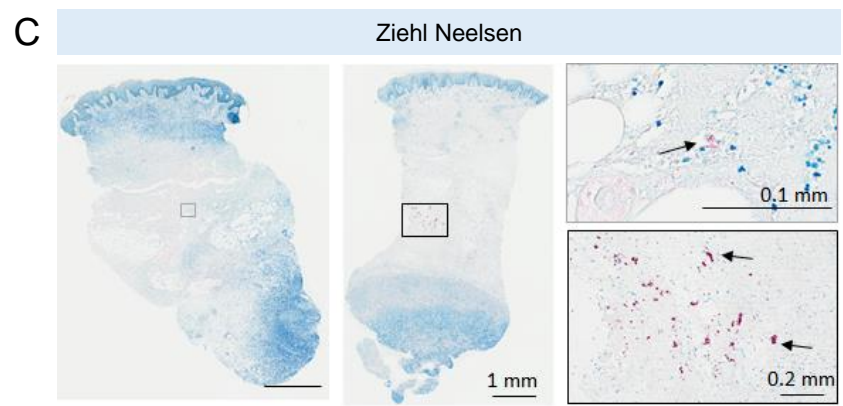

Fig S2

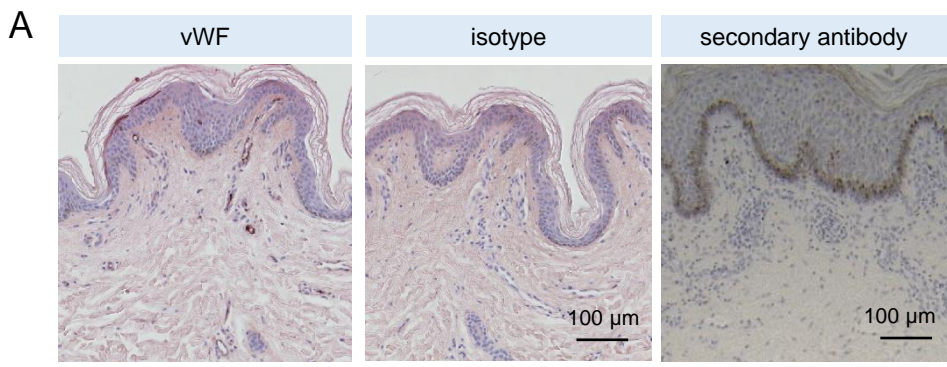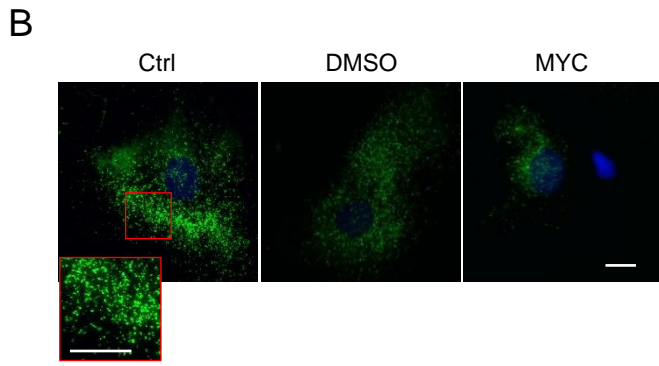

Fig S3

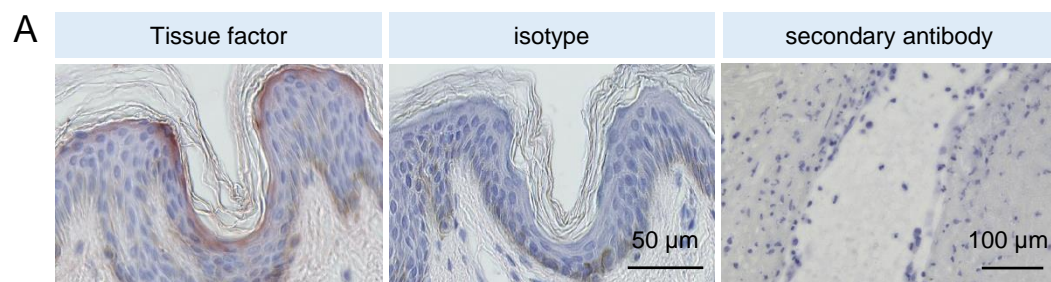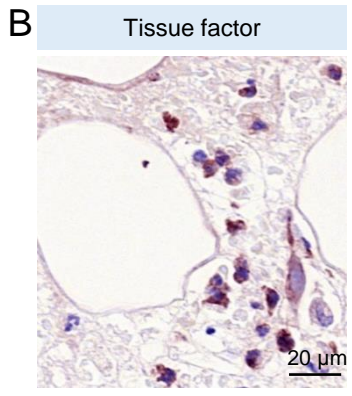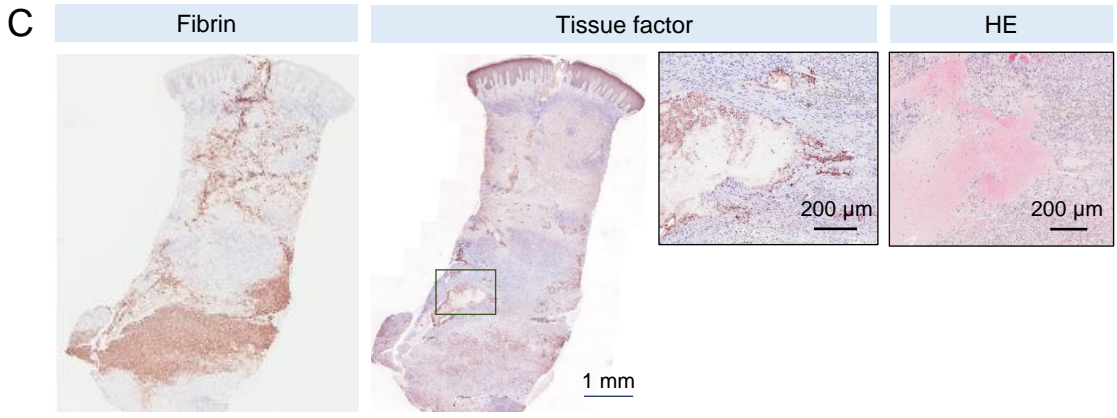

Fig S4

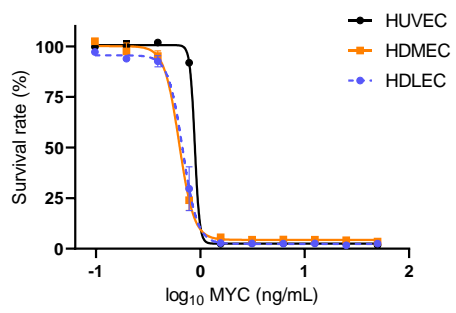

Source: https://medrxiv.org/content/10.1101/2021.08.04.21261598v1.full.pdf
